# Supplementary material for: The search for new amphiphiles: synthesis of a modular, high-throughput library
Source: publisher site journal article supplement (doi:10.3762/bjoc.10.163), 2014-07-10
Supplement: Additional file 1 [file 1860-5397-10-163-S1.pdf]

## Supporting Information

for

### The search for new amphiphiles: synthesis of a modular, high-throughput library

George C. Feast<sup>1</sup>, Thomas Lepitre<sup>1</sup>, Xavier Mulet<sup>1</sup>, Charlotte E. Conn<sup>1</sup>, Oliver E. Hutt<sup>1</sup>, G. Paul Savage\*<sup>1</sup>, Calum J. Drummond\*<sup>1,2</sup>

Address: <sup>1</sup>CSIRO Materials Science and Engineering, Bag 10, Clayton South MDC, VIC 3169, Australia and <sup>2</sup>Current address: School of Applied Sciences, College of Science, Engineering and Health, RMIT University, GPO Box 2476, Melbourne, VIC 3001, Australia.

Email: G. Paul Savage\*- [paul.savage@csiro.au](mailto:paul.savage@csiro.au); Calum J. Drummond\*- [calum.drummond@csiro.au](mailto:calum.drummond@csiro.au)

\*Corresponding author

### Experimental procedures, chemical characterisation data (including <sup>13</sup>C NMR spectra) and preliminary SAXS analysis

#### Contents

|            |                                           |
|------------|-------------------------------------------|
| <b>S2</b>  | General experimental                      |
| <b>S3</b>  | Synthesis of double-chain tails           |
| <b>S11</b> | Synthesis of triple-chain tails           |
| <b>S18</b> | Synthesis of sugar head groups            |
| <b>S20</b> | Amphiphile synthesis and characterisation |
| <b>S25</b> | <sup>13</sup> C NMR spectra               |
| <b>S32</b> | Preliminary SAXS analysis                 |
| <b>S33</b> | References                                |

## General experimental

All solvents used were HPLC grade and all chemicals were purchased from Sigma-Aldrich.

Nuclear magnetic resonance (NMR) spectra were recorded on a Bruker AV400 spectrometer.  $^1\text{H}$  NMR and  $^{13}\text{C}$  NMR were recorded at 400 MHz and 100 MHz, respectively.  $^1\text{H}$  NMR chemical shifts are reported in ppm with the internal chloroform signal at 7.26 ppm. The data are reported as integration, s = singlet, d = doublet, t = triplet, q = quartet, non = nonet, m = multiplet, br = broad, app. = apparent,  $J$  = coupling constant(s) in Hz.  $^{13}\text{C}$  NMR chemical shifts are reported in ppm with the internal chloroform signal at 77.0 ppm.

Amphiphile  $^{13}\text{C}$  NMR spectra were recorded using a Bruker Avance III HD 600 MHz spectrometer with a TCI cryoprobe. The experimental parameters were: 32894.738 Hz sweep width, 1.00 s acquisition time, 1 s recycle delay and using a 90 degree excitation pulse of approximately 11.5  $\mu\text{s}$  at 100 W. Samples were analysed in  $\text{MeOD-}d_4$  and chemical shifts reported in ppm ( $\delta$ ) relative to the solvent residual for methanol at 49.00 ppm.

Infrared spectra were recorded on a Nicolet 6700 FT-IR spectrometer using a diamond Smart iTR ATR attachment. Absorption maxima ( $\lambda_{\text{max}}$ ) are described as s (strong), m (medium), w (weak), or br (broad) and are quoted in wavenumbers ( $\text{cm}^{-1}$ ).

Accurate mass spectra for amphiphilic compounds were recorded on a Bruker AUtoflex III MALDI-TOF/TOF mass spectrometer. Experiment employed: positive ion, reflectron mode. The matrix employed was HCCA ( $\alpha$ -cyano-4-hydroxycinnamic acid).

Copper analysis was carried out on an Agilent 770 ICP-MS. Nitric acid at ca. 100  $^\circ\text{C}$  was used to digest the samples before being made up to 25 mL with Milli Q water. The solutions were then measured directly by ICP-MS.

## Synthesis of double-chain tails

### Prop-2-yn-1-yl 3-hydroxy-2-(hydroxymethyl)-2-methylpropanoate (**2**)<sup>[1]</sup>

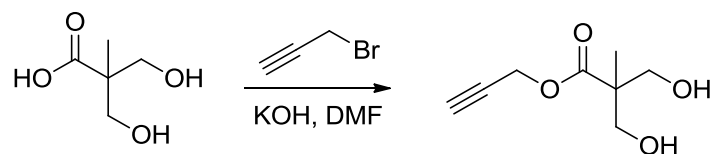

To a stirred solution of 2,2-bis(hydroxymethyl)propionic acid (1.0 equiv) in DMF (5 mL/mmol) was added KOH (1.1 equiv). After stirring for 2 h at 100 °C, propargyl bromide (1.0 equiv) was added dropwise over 30 min. The solution was heated at 80 °C for 18 h, before the reaction mixture was cooled, filtered and concentrated *in vacuo*. The crude product was diluted with ether and subsequently washed with brine and sat. aq. NaHCO<sub>3</sub> solution. The organic fragment was dried over MgSO<sub>4</sub> and concentrated *in vacuo* to give the title compound (4.06 g, 69%) without the need for further purification. Spectroscopic data matched with the literature data.

### General procedure A

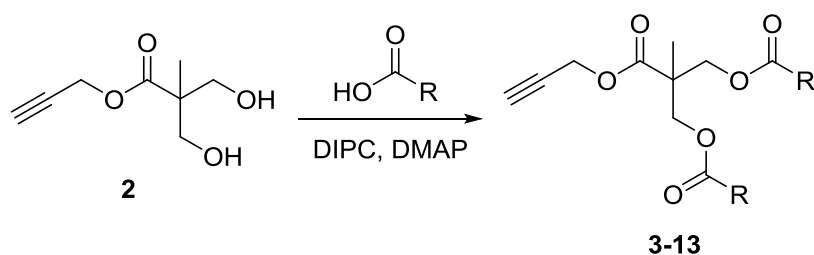

To a stirred solution of carboxylic acid (2.5 equiv) and DMAP (0.2 equiv) in DCM at r.t. (5 mL/mmol) was added diisopropylcarbodiimide (2.2 equiv). Once dissolved, diol **2** (1.0 equiv) was added and stirring continued for 18 h. The reaction mixture was then diluted with DCM and washed with 1.0 M aq. HCl, sat. aq. NaHCO<sub>3</sub> solution and brine, dried over MgSO<sub>4</sub> and concentrated *in vacuo* to give the crude material.

### 2-Methyl-2-((prop-2-yn-1-yloxy)carbonyl)propane-1,3-diyl dioctanoate (**3**)

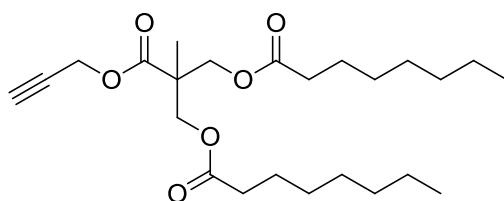

Synthesised in accordance with General Procedure A. Purification by column chromatography (4:1, petrol:ethyl acetate) afforded the compound (446 mg, 72%) as a yellow, viscous liquid;  $\nu_{\max}/\text{cm}^{-1}$  (thin film) 2927m, 2856m, 1738s, 1467m, 1378s, 1225m;  $\delta_{\text{H}}$  (400 MHz,  $\text{CDCl}_3$ ) 0.86 (6H, t,  $J$  7.1,  $2\times\text{CH}_2\text{-CH}_3$ ), 1.20-1.32 (19H, m,  $\text{CH}_3$  and  $8\times\text{CH}_2$ ) 1.52-1.63 (4H, m,  $2\times\text{O}=\text{C-CH}_2\text{-CH}_2$ ), 2.28 (4H, t,  $J$  7.8,  $2\times\text{O}=\text{C-CH}_2$ ), 2.43 (1H, t,  $J$  2.2,  $\equiv\text{CH}$ ) 4.21 (2H, s, C- $\text{CH}_2\text{-O-}$ ), 4.22 (2H, s, C- $\text{CH}_2\text{-O-}$ ), 4.69 (2H, d,  $J$  2.2,  $\equiv\text{C-CH}_2\text{-O-}$ );  $\delta_{\text{C}}$  (100 MHz,  $\text{CDCl}_3$ ) 14.2 ( $2\times\text{CH}_2\text{-CH}_3$ ), 17.8 (C- $\text{CH}_3$ ), 22.7 ( $2\times\text{CH}_2\text{-CH}_3$ ), 25.0 ( $2\times\text{CH}_2$ ), 29.0 ( $2\times\text{CH}_2$ ), 29.2 ( $2\times\text{CH}_2$ ), 31.8 ( $2\times\text{CH}_2$ ), 34.3 ( $2\times\text{CH}_2$ ), 46.5 ( $\text{CR}_4$ ), 52.7 ( $\equiv\text{C-CH}_2\text{-O-}$ ), 65.3 ( $2\times\text{C-CH}_2\text{-O-}$ ), 75.3 ( $\equiv\text{CH}$ ), 77.4 ( $\text{HC}\equiv\text{C-}$ ), 172.3 (O=C), 173.4 ( $2\times\text{O}=\text{C}$ ); Accurate mass (ESI): Found: 425.2897  $\text{C}_{24}\text{H}_{41}\text{O}_6$  ( $\text{MH}^+$ ) requires 425.2903.

**2-Methyl-2-((prop-2-yn-1-yloxy)carbonyl)propane-1,3-diyl bis(decanoate) (4)**

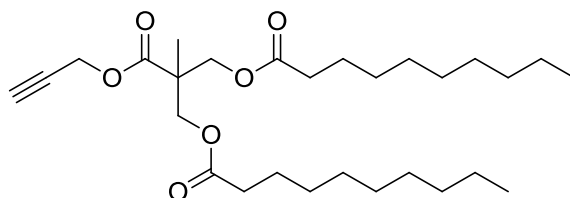

Synthesised in accordance with General Procedure A. Purification by column chromatography (5:1, petrol/ethyl acetate) afforded the compound (494 mg, 71%) as a colourless, viscous liquid;  $\nu_{\max}/\text{cm}^{-1}$  (thin film) 2924m, 2854m, 1740s, 1466m, 1377s, 1235m;  $\delta_{\text{H}}$  (400 MHz,  $\text{CDCl}_3$ ) 0.86 (6H, t,  $J$  6.1,  $2\times\text{CH}_2\text{-CH}_3$ ), 1.25 (27H, br s,  $\text{CH}_3$  and  $12\times\text{CH}_2$ ), 1.53-1.63 (4H, m,  $2\times\text{O}=\text{C-CH}_2\text{-CH}_2$ ), 2.28 (4H, t,  $J$  7.8,  $2\times\text{O}=\text{C-CH}_2$ ), 2.41-2.45 (1H, m,  $\equiv\text{CH}$ ) 4.21 (2H, s, C- $\text{CH}_2\text{-O-}$ ), 4.22 (2H, s, C- $\text{CH}_2\text{-O-}$ ), 4.69 (2H, d,  $J$  3.0,  $\equiv\text{C-CH}_2\text{-O-}$ );  $\delta_{\text{C}}$  (100 MHz,  $\text{CDCl}_3$ ) 14.3 ( $2\times\text{CH}_2\text{-CH}_3$ ), 17.8 (C- $\text{CH}_3$ ), 22.8 ( $2\times\text{CH}_2\text{-CH}_3$ ), 25.0 ( $2\times\text{CH}_2$ ), 29.3 ( $2\times\text{CH}_2$ ), 29.4 ( $2\times\text{CH}_2$ ), 29.6 ( $2\times\text{CH}_2$ ), 32.0 ( $2\times\text{CH}_2$ ), 34.3 ( $2\times\text{CH}_2$ ), 46.5 ( $\text{CR}_4$ ), 52.7 ( $\equiv\text{C-CH}_2\text{-O-}$ ), 65.3 ( $2\times\text{C-CH}_2\text{-O-}$ ), 75.3 ( $\equiv\text{CH}$ ), 77.3 ( $\text{HC}\equiv\text{C-}$ ), 172.3 (O=C), 173.4 ( $2\times\text{O}=\text{C}$ ); Accurate mass (ESI): Found: 481.3524  $\text{C}_{28}\text{H}_{49}\text{O}_6$  ( $\text{MH}^+$ ) requires 481.3524.

**2-Methyl-2-((prop-2-yn-1-yloxy)carbonyl)propane-1,3-diyl bis(dodecanoate) (5)**

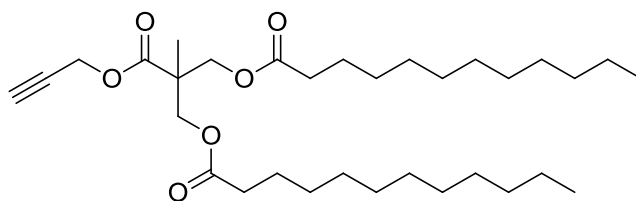

Synthesised in accordance with General Procedure A. Purification by column chromatography (5:1, petrol:ether) afforded the compound (373 mg, 70%) as a colourless, viscous liquid;  $v_{\max}/\text{cm}^{-1}$  (thin film) 2922m, 2853m, 1740s, 1466m, 1376s, 1232m;  $\delta_{\text{H}}$  (400 MHz,  $\text{CDCl}_3$ ) 0.85 (6H, t,  $J$  6.7,  $2\times \text{CH}_2\text{-CH}_3$ ), 1.19-1.33 (35H, m,  $\text{CH}_3$  &  $16\times \text{CH}_2$ ), 1.52-1.62 (4H, m,  $2\times \text{O=C-CH}_2\text{-CH}_2$ ), 2.27 (4H, t,  $J$  7.5,  $2\times \text{O=C-CH}_2$ ), 2.41-2.45 (1H, m,  $\equiv\text{CH}$ ), 4.21 (2H, s, C- $\text{CH}_2\text{-O-}$ ), 4.22 (2H, s, C- $\text{CH}_2\text{-O-}$ ), 4.68 (2H, d,  $J$  2.5,  $\equiv\text{C-CH}_2\text{-O-}$ );  $\delta_{\text{C}}$  (100 MHz,  $\text{CDCl}_3$ ) 14.3 ( $2\times \text{CH}_2\text{-CH}_3$ ), 17.8 (C- $\text{CH}_3$ ), 22.8 ( $2\times \text{CH}_2\text{-CH}_3$ ), 25.0 ( $2\times \text{CH}_2$ ), 29.3 ( $2\times \text{CH}_2$ ), 29.4 ( $2\times \text{CH}_2$ ), 29.5 ( $2\times \text{CH}_2$ ), 29.6 ( $2\times \text{CH}_2$ ), 29.8 ( $2\times \text{CH}_2$ ), 32.1 ( $2\times \text{CH}_2$ ), 34.3 ( $2\times \text{CH}_2$ ), 46.5 ( $\text{CR}_4$ ), 52.7 ( $\equiv\text{C-CH}_2\text{-O-}$ ), 65.3 ( $2\times \text{C-CH}_2\text{-O-}$ ), 75.3 ( $\equiv\text{CH}$ ), 77.3 (HC $\equiv\text{C-}$ ), 172.3 (O=C), 173.4 ( $2\times \text{O=C}$ ); Accurate mass (ESI): Found: 537.4153  $\text{C}_{32}\text{H}_{57}\text{O}_6$  ( $\text{MH}^+$ ) requires 537.4150.

**2-Methyl-2-((prop-2-yn-1-yloxy)carbonyl)propane-1,3-diyl bis(tetradecanoate) (6)**

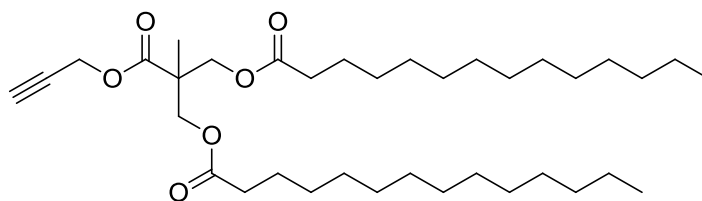

Synthesised in accordance with General Procedure A. Purification by column chromatography (5:1, petrol/ether) afforded the compound (337 mg, 56%) as a colourless, viscous liquid;  $v_{\max}/\text{cm}^{-1}$  (thin film) 2921m, 2851m, 1740s, 1467m, 1377s, 1237m;  $\delta_{\text{H}}$  (400 MHz,  $\text{CDCl}_3$ ) 0.85 (6H, t,  $J$  6.7,  $2\times \text{CH}_2\text{-CH}_3$ ), 1.18-1.33 (43H, m,  $\text{CH}_3$  and  $20\times \text{CH}_2$ ), 1.52-1.62 (4H, m,  $2\times \text{O=C-CH}_2\text{-CH}_2$ ), 2.27 (4H, t,  $J$  7.5,  $2\times \text{O=C-CH}_2$ ), 2.43 (1H, t,  $J$  2.8,  $\equiv\text{CH}$ ), 4.21 (2H, s, C- $\text{CH}_2\text{-O-}$ ), 4.22 (2H, s, C- $\text{CH}_2\text{-O-}$ ), 4.68 (2H, d,  $J$  2.8,  $\equiv\text{C-CH}_2\text{-O-}$ );  $\delta_{\text{C}}$  (100 MHz,  $\text{CDCl}_3$ ) 14.3 ( $2\times \text{CH}_2\text{-CH}_3$ ), 17.8 (C- $\text{CH}_3$ ), 22.8 ( $2\times \text{CH}_2\text{-CH}_3$ ), 25.0 ( $2\times \text{CH}_2$ ), 29.3 ( $2\times \text{CH}_2$ ), 29.4 ( $2\times \text{CH}_2$ ), 29.5 ( $2\times \text{CH}_2$ ), 29.6 ( $2\times \text{CH}_2$ ), 29.8 ( $2\times \text{CH}_2$ ), 29.8 ( $2\times \text{CH}_2$ ), 29.9 ( $2\times \text{CH}_2$ ), 32.1 ( $2\times \text{CH}_2$ ), 34.3 ( $2\times \text{CH}_2$ ), 46.5 ( $\text{CR}_4$ ), 52.7 ( $\equiv\text{C-CH}_2\text{-O-}$ ), 65.3 ( $2\times \text{C-}$

CH<sub>2</sub>-O-), 75.3 ( $\equiv$ CH), 77.3 (HC $\equiv$ C-), 172.3 (O=C), 173.4 (2 $\times$ O=C); Accurate mass (ESI): Found: 593.4774 C<sub>36</sub>H<sub>65</sub>O<sub>6</sub> (MH<sup>+</sup>) requires 593.4776.

**2-Methyl-2-((prop-2-yn-1-yloxy)carbonyl)propane-1,3-diyl bis(hexadecanoate) (7)**

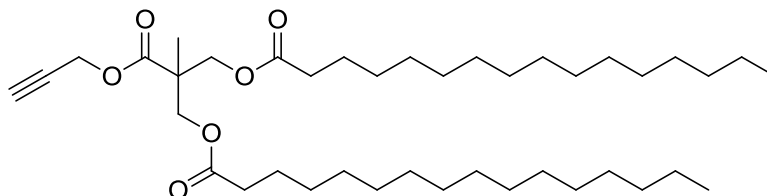

Synthesised in accordance with General Procedure A. Purification by column chromatography (5:1, petrol/ether) afforded the compound (410 mg, 62%) as a white solid;  $\nu_{\max}/\text{cm}^{-1}$  (thin film) 2916m, 2849m, 1732s, 1463m, 1378s, 1245m;  $\delta_{\text{H}}$  (400 MHz, CDCl<sub>3</sub>) 0.86 (6H, t, *J* 6.8, 2 $\times$  CH<sub>2</sub>-CH<sub>3</sub>), 1.18-1.34 (51H, m, CH<sub>3</sub> & 24 $\times$ CH<sub>2</sub>) 1.53-1.63 (4H, m, 2 $\times$ O=C-CH<sub>2</sub>-CH<sub>2</sub>), 2.27 (4H, t, *J* 7.1, 2 $\times$ O=C-CH<sub>2</sub>), 2.43 (1H, t, *J* 2.4,  $\equiv$ CH) 4.21 (2H, s, C-CH<sub>2</sub>-O-), 4.22 (2H, s, C-CH<sub>2</sub>-O-), 4.68 (2H, d, *J* 2.4,  $\equiv$ C-CH<sub>2</sub>-O-);  $\delta_{\text{C}}$  (100 MHz, CDCl<sub>3</sub>) 14.3 (2 $\times$ CH<sub>2</sub>-CH<sub>3</sub>), 17.8 (C-CH<sub>3</sub>), 22.9 (2 $\times$ CH<sub>2</sub>-CH<sub>3</sub>), 25.0 (2 $\times$ CH<sub>2</sub>), 29.3 (2 $\times$ CH<sub>2</sub>), 29.4 (2 $\times$ CH<sub>2</sub>), 29.5 (2 $\times$ CH<sub>2</sub>), 29.6 (2 $\times$ CH<sub>2</sub>), 29.8 (2 $\times$ CH<sub>2</sub>), 29.8 (4 $\times$ CH<sub>2</sub>), 29.9 (4 $\times$ CH<sub>2</sub>), 32.1 (2 $\times$ CH<sub>2</sub>), 34.3 (2 $\times$ CH<sub>2</sub>), 46.5 (CR<sub>4</sub>), 52.7 ( $\equiv$ C-CH<sub>2</sub>-O-), 65.3 (2 $\times$ C-CH<sub>2</sub>-O-), 75.3 ( $\equiv$ CH), 77.3 (HC $\equiv$ C-), 172.3 (O=C), 173.4 (2 $\times$ O=C); Accurate mass (ESI): Found: 649.5399 C<sub>40</sub>H<sub>73</sub>O<sub>6</sub> (MH<sup>+</sup>) requires 649.5402.

**2-Methyl-2-((prop-2-yn-1-yloxy)carbonyl)propane-1,3-diyl bis(octadecanoate) (8)**

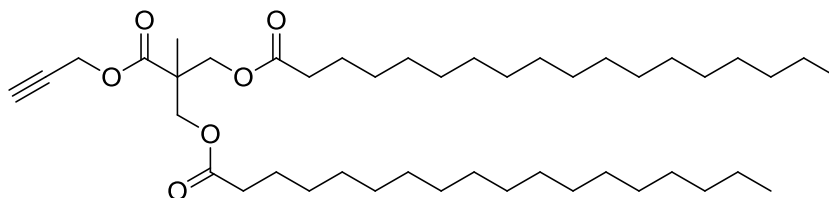

Synthesised in accordance with General Procedure A. Purification by column chromatography (5:1, petrol/ether) afforded the compound (410 mg, 62%) as a white solid;  $\nu_{\max}/\text{cm}^{-1}$  (thin film) 2915m, 2849m, 1738s, 1467m, 1380s, 1235m;  $\delta_{\text{H}}$  (400 MHz, CDCl<sub>3</sub>) 0.86 (6H, t, *J* 6.8, 2 $\times$  CH<sub>2</sub>-CH<sub>3</sub>), 1.18-1.33 (59H, m, CH<sub>3</sub> and 28 $\times$ CH<sub>2</sub>) 1.53-1.61 (4H, m, 2 $\times$ O=C-CH<sub>2</sub>-CH<sub>2</sub>), 2.27 (4H, t, *J* 7.4, 2 $\times$ O=C-

CH<sub>2</sub>), 2.43 (1H, t, *J* 2.4, ≡CH) 4.21 (2H, s, C-CH<sub>2</sub>-O-), 4.22 (2H, s, C-CH<sub>2</sub>-O-), 4.68 (2H, d, *J* 2.4, ≡C-CH<sub>2</sub>-O-); δ<sub>C</sub> (100 MHz, CDCl<sub>3</sub>) 14.3 (2×CH<sub>2</sub>-CH<sub>3</sub>), 17.8 (C-CH<sub>3</sub>), 22.9 (2×CH<sub>2</sub>-CH<sub>3</sub>), 25.0 (2×CH<sub>2</sub>), 29.3 (2×CH<sub>2</sub>), 29.4 (2×CH<sub>2</sub>), 29.8 (2×CH<sub>2</sub>), 29.6 (2×CH<sub>2</sub>), 29.8 (2×CH<sub>2</sub>), 29.8 (4×CH<sub>2</sub>), 29.9 (8×CH<sub>2</sub>), 32.1 (2×CH<sub>2</sub>), 34.3 (2×CH<sub>2</sub>), 46.8 (CR<sub>4</sub>), 52.7 (≡C-CH<sub>2</sub>-O-), 65.3 (2×C-CH<sub>2</sub>-O-), 75.3 (≡CH), 77.3 (HC≡C-), 172.3 (O=C), 173.4 (2×O=C).

**2-Methyl-2-((prop-2-yn-1-yloxy)carbonyl)propane-1,3-diyl bis(3,7,11,15-tetramethylhexadecanoate) (9)**

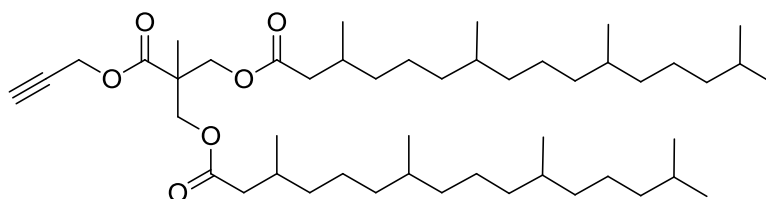

Synthesised in accordance with General Procedure A. Purification by column chromatography (5:1, petrol/ether) afforded the compound (303 mg, 52%) as a colourless, viscous oil;  $\nu_{\max}/\text{cm}^{-1}$  (thin film) 2953m, 2925m, 2868m, 1741s, 1462m, 1377m, 1236m; δ<sub>H</sub> (400 MHz, CDCl<sub>3</sub>) 0.79-0.87 (24H, app. dd, *J* 6.8, 6.5, 8×CH-CH<sub>3</sub>), 0.89 (6H, d, *J* 6.5, 2×O=C-CH<sub>2</sub>-CH-CH<sub>3</sub>), 0.99-1.40 (43H, m, CH<sub>3</sub> and 18×CH<sub>2</sub> and 4×CH), 1.50 (2H, m, *J* 6.8, 2×CH<sub>2</sub>-CH-(CH<sub>3</sub>)<sub>2</sub>), 1.83-1.96 (2H, m, 2×O=C-CH<sub>2</sub>-CH), 2.08 (2H, dd, *J* 14.5, 8.3, 2×O=C-CHH'-CH), 2.29 (2H, dd, *J* 15.1, 5.8, 2×O=C-CHH'-CH), 2.43 (1H, t, *J* 2.5, ≡CH), 4.19-4.24 (4H, s, 2×C-CH<sub>2</sub>-O-), 4.68 (2H, d, *J* 2.5, ≡C-CH<sub>2</sub>-O-); δ<sub>C</sub> (100 MHz, CDCl<sub>3</sub>) 17.8 (C-CH<sub>3</sub>), 19.8 (CH-CH<sub>3</sub>), 19.8 (CH-CH<sub>3</sub>), 19.8 (2×CH-CH<sub>3</sub>), 19.9 (CH-CH<sub>3</sub>), 19.9 (CH-CH<sub>3</sub>), 22.8 (2×CH-CH<sub>3</sub>), 22.9 (2×CH-CH<sub>3</sub>), 24.5 (2×CH<sub>2</sub>-CH<sub>2</sub>-CH<sub>2</sub>), 24.6 (2×CH<sub>2</sub>-CH<sub>2</sub>-CH<sub>2</sub>), 25.0 (2×CH<sub>2</sub>-CH<sub>2</sub>-CH<sub>2</sub>), 28.1 (3×R<sub>3</sub>CH), 30.5 (2×R<sub>3</sub>CH), 32.9 (3×R<sub>3</sub>CH), 37.2 (2×CH<sub>2</sub>-CH), 37.3 (CH<sub>2</sub>-CH), 37.4 (CH<sub>2</sub>-CH), 37.4 (2×CH<sub>2</sub>-CH), 37.6 (2×CH<sub>2</sub>-CH), 37.6 (2×CH<sub>2</sub>-CH), 39.5 (2×CH<sub>2</sub>-CH-(CH<sub>3</sub>)<sub>2</sub>), 41.8 (O=C-CH<sub>2</sub>-CH), 41.8 (O=C-CH<sub>2</sub>-CH), 46.4 (CR<sub>4</sub>), 52.7 (≡C-CH<sub>2</sub>-O-), 65.3 (2×C-CH<sub>2</sub>-O-), 75.3 (≡CH), 77.3 (HC≡C-), 172.2 (O=C), 172.9 (2×O=C); Accurate mass (ESI): Found: 761.6643 C<sub>48</sub>H<sub>89</sub>O<sub>6</sub> (MH<sup>+</sup>) requires 761.6661.

**(7Z,7'Z)-2-Methyl-2-((prop-2-yn-1-yloxy)carbonyl)propane-1,3-diyl bis(hexadec-7-enoate) (10)**

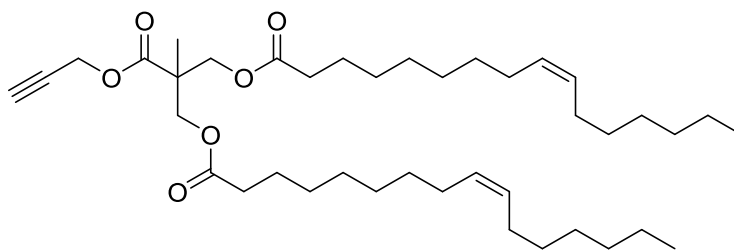

Synthesised in accordance with General Procedure A. Purification by column chromatography (5:1, petrol/ether) afforded the compound (410 mg, 62%) as a colourless, viscous oil;  $\nu_{\max}/\text{cm}^{-1}$  (thin film) 2916m, 2849m, 1733s, 1473m, 1463m, 1235m, 1213m;  $\delta_{\text{H}}$  (400 MHz,  $\text{CDCl}_3$ ) 0.86 (6H, t,  $J$  6.5,  $2\times\text{CH}_2\text{-CH}_3$ ), 1.20-1.34 (35H, m,  $\text{CH}_3$  &  $16\times\text{CH}_2$ ) 1.52-1.62 (4H, m,  $2\times\text{O}=\text{C-CH}_2\text{-CH}_2$ ), 1.94-2.04 (8H, m,  $4\times=\text{CH-CH}_2$ ), 2.28 (4H, t,  $J$  7.4,  $2\times\text{O}=\text{C-CH}_2$ ), 2.43 (1H, t,  $J$  2.2,  $\equiv\text{CH}$ ), 4.21 (2H, s,  $\text{C-CH}_2\text{-O}$ ), 4.22 (2H, s,  $\text{C-CH}_2\text{-O}$ ), 4.68 (2H, d,  $J$  2.2,  $\equiv\text{C-CH}_2\text{-O}$ ), 5.32 (4H, dt,  $J$  5.6, 3.6,  $2\times\text{CH}=\text{CH}$ );  $\delta_{\text{C}}$  (100 MHz,  $\text{CDCl}_3$ ) 14.3 ( $2\times\text{CH}_2\text{-CH}_3$ ), 17.8 ( $\text{C-CH}_3$ ), 22.8 ( $2\times\text{CH}_2\text{-CH}_3$ ), 25.0 ( $2\times\text{CH}_2$ ), 27.3 ( $2\times=\text{C-CH}_2$ ), 27.4 ( $2\times\text{CH}_2\text{-C}=\text{}$ ), 29.1 ( $2\times\text{CH}_2$ ), 29.3 ( $2\times\text{CH}_2$ ), 29.3 ( $2\times\text{CH}_2$ ), 29.9 ( $2\times\text{CH}_2$ ), 29.9 ( $2\times\text{CH}_2$ ), 31.9 ( $2\times\text{CH}_2$ ), 34.3 ( $2\times\text{CH}_2$ ), 46.8 ( $\text{CR}_4$ ), 52.7 ( $\equiv\text{C-CH}_2\text{-O}$ ), 65.3 ( $2\times\text{C-CH}_2\text{-O}$ ), 75.3 ( $\equiv\text{CH}$ ), 77.3 ( $\text{HC}\equiv\text{C-}$ ), 129.9 ( $2\times\text{C}=\text{C}$ ), 130.1 ( $2\times\text{C}=\text{C}$ ), 172.2 ( $\text{O}=\text{C}$ ), 173.4 ( $2\times\text{O}=\text{C}$ ); Accurate mass (ESI): Found: 667.4906  $\text{C}_{40}\text{H}_{68}\text{O}_6\text{Na}$  ( $\text{MNa}^+$ ) requires 667.4908.

**(Z)-2-Methyl-2-((prop-2-yn-1-yloxy)carbonyl)propane-1,3-diyl dioleate (11)**

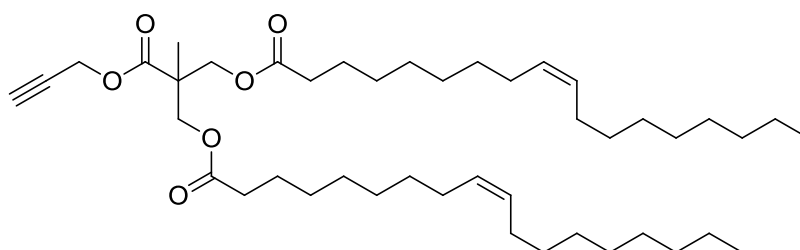

Synthesised in accordance with General Procedure A. Purification by column chromatography (5:1, petrol/ether) afforded the compound (464 mg, 76%) as a colourless, viscous oil;  $\nu_{\max}/\text{cm}^{-1}$  (thin film) 2922m, 2853m, 1742s, 1465m, 1463m, 1377m, 1237m;  $\delta_{\text{H}}$  (400 MHz,  $\text{CDCl}_3$ ) 0.86 (6H, t,  $J$  6.8,  $2\times\text{CH}_2\text{-CH}_3$ ), 1.19-1.34 (47H, m,  $\text{CH}_3$  and  $22\times\text{CH}_2$ ) 1.53-1.62 (4H, m,  $2\times\text{O}=\text{C-CH}_2\text{-CH}_2$ ), 1.95-2.02 (8H, m,  $4\times=\text{CH-CH}_2$ ), 2.28 (4H, t,  $J$  6.2,  $2\times\text{O}=\text{C-CH}_2$ ), 2.43 (1H, t,  $J$  2.5,  $\equiv\text{CH}$ ) 4.21 (2H, s,  $\text{C-CH}_2\text{-O}$ ), 4.22 (2H, s,  $\text{C-CH}_2\text{-O}$ ), 4.68 (2H, d,  $J$  2.2,  $\equiv\text{C-CH}_2\text{-O}$ ), 5.32 (4H, dt,  $J$  5.6, 3.6,  $2\times\text{CH}=\text{CH}$ );  $\delta_{\text{C}}$  (100 MHz,  $\text{CDCl}_3$ ) 14.3 ( $2\times\text{CH}_2\text{-CH}_3$ ), 17.8 ( $\text{C-CH}_3$ ), 22.8 ( $2\times\text{CH}_2\text{-CH}_3$ ), 25.0 ( $2\times\text{CH}_2$ ), 27.3 ( $2\times=\text{C-CH}_2$ ), 27.4 ( $2\times\text{CH}_2\text{-C}=\text{}$ ), 29.1 ( $2\times\text{CH}_2$ ), 29.3 ( $2\times\text{CH}_2$ ), 29.3 ( $2\times\text{CH}_2$ ), 29.9 ( $2\times\text{CH}_2$ ), 29.9 ( $2\times\text{CH}_2$ ), 31.9 ( $2\times\text{CH}_2$ ), 34.3 ( $2\times\text{CH}_2$ ), 46.8 ( $\text{CR}_4$ ), 52.7 ( $\equiv\text{C-CH}_2\text{-O}$ ), 65.3 ( $2\times\text{C-CH}_2\text{-O}$ ), 75.3 ( $\equiv\text{CH}$ ), 77.3 ( $\text{HC}\equiv\text{C-}$ ), 129.9 ( $2\times\text{C}=\text{C}$ ), 130.1 ( $2\times\text{C}=\text{C}$ ), 172.2 ( $\text{O}=\text{C}$ ), 173.4 ( $2\times\text{O}=\text{C}$ ); Accurate mass (ESI): Found: 667.4906  $\text{C}_{40}\text{H}_{68}\text{O}_6\text{Na}$  ( $\text{MNa}^+$ ) requires 667.4908.



O-), 4.22 (2H, s, C-CH<sub>2</sub>-O-), 4.68 (2H, d, *J* 2.5, ≡C-CH<sub>2</sub>-O-), 5.32 (4H, dt, *J* 5.6, 3.4, 2×-CH=CH-); δ<sub>C</sub> (100 MHz, CDCl<sub>3</sub>) 14.3 (2×CH<sub>2</sub>-CH<sub>3</sub>), 17.8 (C-CH<sub>3</sub>), 22.8 (2×CH<sub>2</sub>-CH<sub>3</sub>), 25.0 (2×CH<sub>2</sub>), 27.3 (2×=C-CH<sub>2</sub>), 27.4 (2×CH<sub>2</sub>-C=), 29.3 (2×CH<sub>2</sub>), 29.3 (2×CH<sub>2</sub>), 29.3 (2×CH<sub>2</sub>), 29.5 (2×CH<sub>2</sub>), 29.7 (2×CH<sub>2</sub>), 29.9 (2×CH<sub>2</sub>), 29.9 (2×CH<sub>2</sub>), 32.1 (2×CH<sub>2</sub>), 34.3 (2×CH<sub>2</sub>), 46.5 (CR<sub>4</sub>), 52.7 (≡C-CH<sub>2</sub>-O-), 65.3 (2×C-CH<sub>2</sub>-O-), 75.3 (≡CH), 77.3 (HC≡C-), 129.9 (2×C=C) 130.2 (2×C=C), 172.2 (O=C), 173.4 (2×O=C); Accurate mass (ESI): Found: 701.5712 C<sub>44</sub>H<sub>77</sub>O<sub>6</sub> (MH<sup>+</sup>) requires 701.5715.

**(Z)-2-Methyl-2-((prop-2-yn-1-yloxy)carbonyl)propane-1,3-diyl bis(docos-13-enoate) (12)**

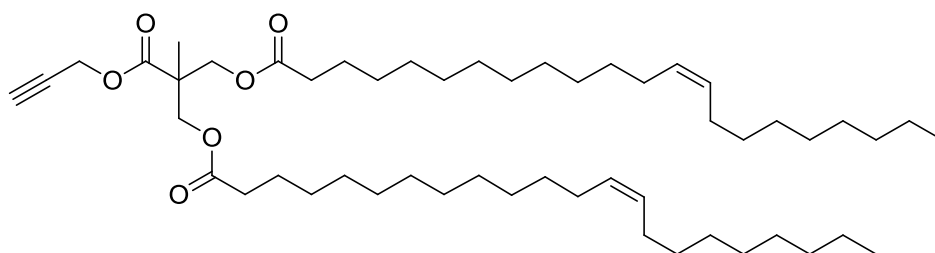

Synthesised in accordance with General Procedure A. Purification by column chromatography (5:1, petrol/ether) afforded the compound (487 mg, 69%) as a colourless, viscous oil;  $\nu_{\max}/\text{cm}^{-1}$  (thin film) 2921m, 2852m, 1743s, 1465m, 1377m, 1236m; δ<sub>H</sub> (400 MHz, CDCl<sub>3</sub>) 0.86 (6H, t, *J* 6.5, 2×CH<sub>2</sub>-CH<sub>3</sub>), 1.19-1.34 (63H, m, CH<sub>3</sub> and 30×CH<sub>2</sub>) 1.52-1.61 (4H, m, 2×O=C-CH<sub>2</sub>-CH<sub>2</sub>), 1.99 (8H, q, *J* 6.4, 4×=CH-CH<sub>2</sub>), 2.28 (4H, t, *J* 7.3, 2×O=C-CH<sub>2</sub>), 2.43 (1H, t, *J* 2.5, ≡CH), 4.21 (2H, s, C-CH<sub>2</sub>-O-), 4.22 (2H, s, C-CH<sub>2</sub>-O-), 4.69 (2H, d, *J* 2.5, ≡C-CH<sub>2</sub>-O-), 5.32 (4H, *J* 8.9, 4.5, 2×-CH=CH-); δ<sub>C</sub> (100 MHz, CDCl<sub>3</sub>) 14.3 (2×CH<sub>2</sub>-CH<sub>3</sub>), 17.8 (C-CH<sub>3</sub>), 22.8 (2×CH<sub>2</sub>-CH<sub>3</sub>), 25.0 (2×CH<sub>2</sub>), 27.4 (4×=C-CH<sub>2</sub>), 29.3 (2×CH<sub>2</sub>), 29.4 (2×CH<sub>2</sub>), 29.5 (2×CH<sub>2</sub>), 29.6 (2×CH<sub>2</sub>), 29.7 (4×CH<sub>2</sub>), 29.7 (2×CH<sub>2</sub>), 29.8 (2×CH<sub>2</sub>), 29.9 (2×CH<sub>2</sub>), 32.1 (2×CH<sub>2</sub>), 34.3 (2×CH<sub>2</sub>), 46.5 (CR<sub>4</sub>), 52.7 (≡C-CH<sub>2</sub>-O-), 65.3 (2×C-CH<sub>2</sub>-O-), 75.3 (≡CH), 77.3 (HC≡C-), 130.0 (2×C=C) 130.1 (2×C=C), 172.3 (O=C), 173.4 (2×O=C); Accurate mass (ESI): Found: 813.6971 C<sub>52</sub>H<sub>93</sub>O<sub>6</sub> (MH<sup>+</sup>) requires 813.6974.

**(9Z,9'Z,12Z,12'Z)-2-Methyl-2-((prop-2-yn-1-yloxy)carbonyl)propane-1,3-diyl bis(octadeca-9,12-dienoate) (13)**

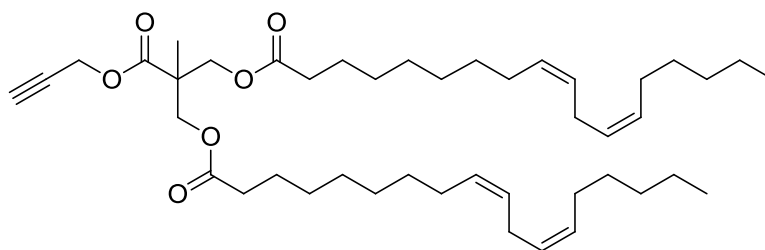

Synthesised in accordance with General Procedure A. Purification by column chromatography (5:1, petrol/ether) afforded the compound (192 mg, 40%) as a colourless, viscous oil;  $\nu_{\max}/\text{cm}^{-1}$  (thin film) 2925m, 2852m, 1742s, 1465m, 1377m, 1236m;  $\delta_{\text{H}}$  (400 MHz,  $\text{CDCl}_3$ ) 0.86 (6H, t,  $J$  6.7,  $2\times\text{CH}_2\text{-CH}_3$ ), 1.20-1.38 (35H, m,  $\text{CH}_3$  and  $16\times\text{CH}_2$ ) 1.53-1.62 (4H, m,  $2\times\text{O=C-CH}_2\text{-CH}_2$ ), 2.02 (8H, q,  $J$  6.7,  $4\times\text{=CH-CH}_2$ ), 2.28 (4H, t,  $J$  7.4,  $2\times\text{O=C-CH}_2$ ), 2.43 (1H, t,  $J$  2.5,  $\equiv\text{CH}$ ), 2.75 (4H, t,  $J$  6.5,  $\text{C=C-CH}_2\text{-C=C}$ ), 4.21 (2H, s,  $\text{C-CH}_2\text{-O-}$ ), 4.22 (2H, s,  $\text{C-CH}_2\text{-O-}$ ), 4.69 (2H, d,  $J$  2.5,  $\equiv\text{C-CH}_2\text{-O-}$ ), 5.26-5.40 (8H, ,m,  $4\times\text{-CH=CH-}$ );  $\delta_{\text{C}}$  (100 MHz,  $\text{CDCl}_3$ ) 14.2 ( $2\times\text{CH}_2\text{-CH}_3$ ), 17.8 ( $\text{C-CH}_3$ ), 22.7 ( $2\times\text{CH}_2\text{-CH}_3$ ), 25.0 ( $2\times\text{CH}_2$ ), 25.8 ( $2\times\text{=C-CH}_2\text{-C=}$ ), 27.4 ( $4\times\text{=C-CH}_2$ ), 29.2 ( $2\times\text{CH}_2$ ), 29.3 ( $2\times\text{CH}_2$ ), 29.3 ( $2\times\text{CH}_2$ ), 29.5 ( $2\times\text{CH}_2$ ), 29.8 ( $2\times\text{CH}_2$ ), 31.7 ( $2\times\text{CH}_2$ ), 34.2 ( $2\times\text{CH}_2$ ), 46.5 ( $\text{CR}_4$ ), 52.7 ( $\equiv\text{C-CH}_2\text{-O-}$ ), 65.3 ( $2\times\text{C-CH}_2\text{-O-}$ ), 75.3 ( $\equiv\text{CH}$ ), 77.3 ( $\text{HC}\equiv\text{C-}$ ), 128.1 ( $2\times\text{C=C}$ ) 128.2 ( $2\times\text{C=C}$ ), 130.2 ( $2\times\text{C=C}$ ), 130.4 ( $2\times\text{C=C}$ ), 172.2 ( $\text{O=C}$ ), 173.4 ( $2\times\text{O=C}$ ); Accurate mass (ESI): Found: 697.5385  $\text{C}_{44}\text{H}_{73}\text{O}_6$  ( $\text{MH}^+$ ) requires 697.5405.

## Synthesis of triple chain tails

### *N*-(1,3-Dihydroxy-2-(hydroxymethyl)propan-2-yl)pent-4-ynamide (**15**)

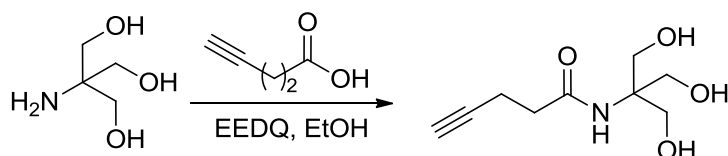

To a stirred solution of tri-(hydroxymethyl)-methylamine (TRIS) (1.1 equiv) and *N*-ethoxycarbonyl-2-ethoxy-1,2-dihydroquinoline (EEDQ) (1.2 equiv) in ethanol (5 mL/mmol) was added 4-pentynoic acid (1.0 equiv). The reaction mixture was heated to 60 °C and stirred for 20 h. The reaction mixture was cooled, filtered and concentrated in vacuo to give the crude material. Purification by column chromatography (5:2 ethyl acetate/petrol) afforded the compound (951 mg, 84%) as a white solid;  $\nu_{\text{max}}/\text{cm}^{-1}$  (thin film) 3446br, 2935br, 1656s, 1389m, 1215m;  $\delta_{\text{H}}$  (400 MHz, MeOD) 2.25 (1H, s,  $\equiv\text{CH}$ ), 2.44 (4H, m,  $\equiv\text{C}-\text{CH}_2-\text{CH}_2-\text{C}=\text{O}$ ), 3.70 (6H, s,  $3\times\text{CH}_2-\text{OH}$ );  $\delta_{\text{C}}$  (100 MHz,  $\text{CDCl}_3$ ) 14.4 ( $\equiv\text{C}-\text{CH}_2$ ), 35.2 ( $\text{CH}_2-\text{C}=\text{O}$ ), 61.3 ( $3\times\text{CH}_2-\text{OH}$ ), 62.5 ( $\text{C}-\text{NH}$ ), 69.1 ( $\equiv\text{CH}$ ), 82.4 ( $\equiv\text{C}-\text{CH}_2$ ), 173.8 ( $\text{O}=\text{C}$ ); Accurate mass (ESI): Found: 202.1076  $\text{C}_9\text{H}_{16}\text{O}_4\text{N}$  ( $\text{MH}^+$ ) requires 202.1079.

### General procedure B

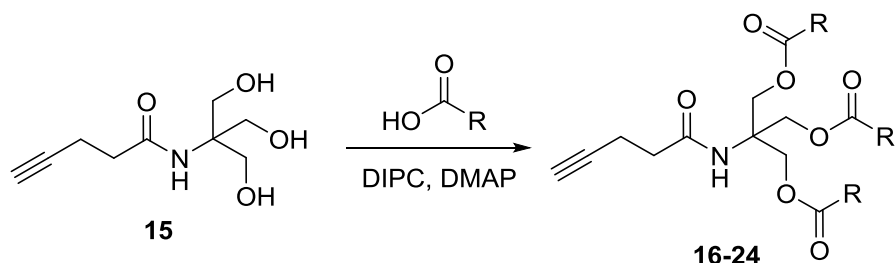

To a stirred solution of carboxylic acid (3.5 equiv) and DMAP (0.3 equiv) in DCM at rt (5 mL/mmol) was added diisopropylcarbodiimide (3.3 equiv). Once dissolved, propargyl amide **15** (1.0 equiv) was added and stirring continued for 18 h. The reaction was then diluted with DCM and washed with 1.0 M aq. HCl, sat. aq.  $\text{NaHCO}_3$  solution and brine, dried over  $\text{MgSO}_4$  and concentrated in vacuo to give the crude product.

**2-((Octanoyloxy)methyl)-2-(pent-4-ynamido)propane-1,3-diyl dioctanoate (16)**

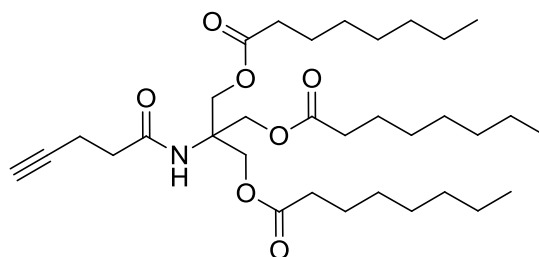

Synthesised in accordance with General Procedure B. Purification by column chromatography (5:1, petrol/ethyl acetate) afforded the compound (556 mg, 77%) as a colourless, viscous liquid;  $\nu_{\max}/\text{cm}^{-1}$  (thin film) 3313br, 2924m, 2855m, 1737s, 1661s, 1546m, 1464m, 1379m;  $\delta_{\text{H}}$  (400 MHz,  $\text{CDCl}_3$ ) 0.86 (9H, t,  $J$  6.1,  $3 \times \text{CH}_2\text{-CH}_3$ ), 1.19-1.34 (24H, m,  $12 \times \text{CH}_2$ ) 1.53-1.65 (6H, m,  $3 \times \text{O}=\text{C-CH}_2\text{-CH}_2$ ), 1.95 (1H, t,  $J$  2.5,  $\equiv\text{CH}$ ), 2.26-2.37 (8H, m,  $\equiv\text{C-CH}_2\text{-CH}_2$ , overlays t,  $J$  7.8,  $3 \times \text{O}=\text{C-CH}_2$ ), 2.41-2.47 (2H, m,  $\equiv\text{C-CH}_2$ ), 4.40 (6H, s,  $3 \times \text{CH}_2\text{-O-}$ ) 6.02 (1H, br s, NH);  $\delta_{\text{C}}$  (100 MHz,  $\text{CDCl}_3$ ) 14.2 ( $3 \times \text{CH}_2\text{-CH}_3$ ), 14.9 ( $\equiv\text{C-CH}_2\text{-CH}_2$ ), 22.7 ( $3 \times \text{CH}_2\text{-CH}_3$ ), 25.0 ( $3 \times \text{CH}_2$ ), 29.1 ( $3 \times \text{CH}_2$ ), 29.2 ( $3 \times \text{CH}_2$ ), 31.8 ( $3 \times \text{CH}_2$ ), 34.2 ( $3 \times \text{CH}_2$ ), 36.0 ( $\equiv\text{C-CH}_2\text{-CH}_2$ ), 58.6 ( $\text{CR}_3\text{N}$ ), 62.7 ( $3 \times \text{C-CH}_2\text{-O-}$ ), 69.5 ( $\equiv\text{CH}$ ), 82.8 ( $\text{HC}\equiv\text{C-}$ ), 171.2 ( $\text{O}=\text{C}$ ), 173.6 ( $3 \times \text{O}=\text{C}$ ); Accurate mass (ESI): Found: 580.4212  $\text{C}_{33}\text{H}_{58}\text{O}_7\text{N}$  ( $\text{MH}^+$ ) requires 580.4213.

**2-((Decanoyloxy)methyl)-2-(pent-4-ynamido)propane-1,3-diyl bis(decanoate) (17)**

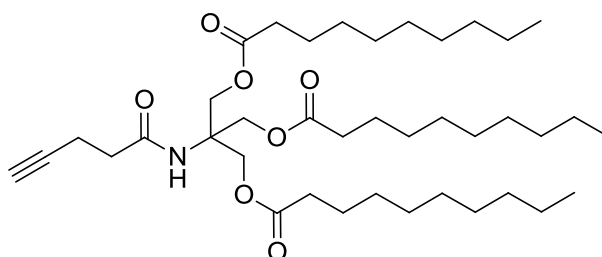

Synthesised in accordance with General Procedure B. Purification by column chromatography (6:1, petrol/ethyl acetate) afforded the compound (520 mg, 72%) as a white solid;  $\nu_{\max}/\text{cm}^{-1}$  (thin film) 2923m, 2854m, 1740s, 1686s, 1544m, 1466m, 1378m, 1241m;  $\delta_{\text{H}}$  (400 MHz,  $\text{CDCl}_3$ ) 0.85 (9H, t,  $J$  6.8,  $3 \times \text{CH}_2\text{-CH}_3$ ), 1.19-1.33 (36H, m,  $18 \times \text{CH}_2$ ) 1.53-1.63 (6H, m,  $3 \times \text{O}=\text{C-CH}_2\text{-CH}_2$ ), 1.96 (1H, t,  $J$  2.8,  $\equiv\text{CH}$ ), 2.26-2.37 (8H, m,  $\equiv\text{C-CH}_2\text{-CH}_2$ , overlays t,  $J$  7.1,  $3 \times \text{O}=\text{C-CH}_2$ ), 2.43-2.48 (2H, m,  $\equiv\text{C-}$

$\text{CH}_2$ ), 4.41 (6H, s,  $3\times\text{CH}_2\text{-O-}$ ), 6.02 (1H, br s,  $\text{NH}$ );  $\delta_{\text{C}}$  (100 MHz,  $\text{CDCl}_3$ ) 14.3 ( $3\times\text{CH}_2\text{-CH}_3$ ), 14.9 ( $\equiv\text{C-CH}_2\text{-CH}_2$ ), 22.8 ( $3\times\text{CH}_2\text{-CH}_3$ ), 25.0 ( $3\times\text{CH}_2$ ), 29.3 ( $3\times\text{CH}_2$ ), 29.4 ( $6\times\text{CH}_2$ ), 29.6 ( $3\times\text{CH}_2$ ), 32.0 ( $3\times\text{CH}_2$ ), 34.3 ( $3\times\text{CH}_2$ ), 36.0 ( $\equiv\text{C-CH}_2\text{-CH}_2$ ), 58.7 ( $\text{CR}_3\text{N}$ ), 62.7 ( $3\times\text{C-CH}_2\text{-O-}$ ), 69.5 ( $\equiv\text{CH}$ ), 82.8 ( $\text{HC}\equiv\text{C-}$ ), 171.2 ( $\text{O}=\text{C}$ ), 173.6 ( $3\times\text{O}=\text{C}$ ); Accurate mass (ESI): Found: 664.5148  $\text{C}_{39}\text{H}_{70}\text{O}_7\text{N}$  ( $\text{MH}^+$ ) requires 664.5147.

**2-((Dodecanoyloxy)methyl)-2-(pent-4-ynamido)propane-1,3-diyl didodecanoate (18)**

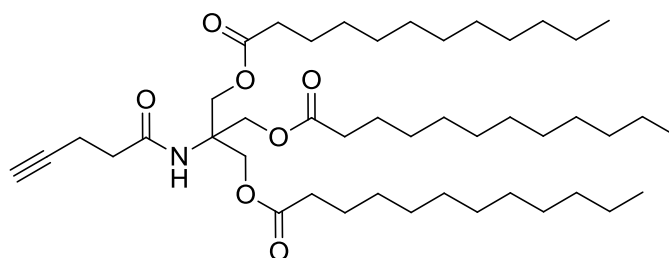

Synthesised in accordance with General Procedure B. Purification by column chromatography (6:1, petrol/ethyl acetate) afforded the compound (527 mg, 71%) as a white solid;  $\nu_{\text{max}}/\text{cm}^{-1}$  (thin film) 2917s, 2849s, 1735s, 1651s, 1557m, 1468m, 1373m, 1269m;  $\delta_{\text{H}}$  (400 MHz,  $\text{CDCl}_3$ ) 0.86 (9H, t,  $J$  6.7,  $3\times\text{CH}_2\text{-CH}_3$ ), 1.20-1.33 (48H, m,  $24\times\text{CH}_2$ ) 1.54-1.63 (6H, m,  $3\times\text{O}=\text{C-CH}_2\text{-CH}_2$ ), 1.96 (1H, t,  $J$  2.5,  $\equiv\text{CH}$ ), 2.27-2.37 (8H, m,  $\equiv\text{C-CH}_2\text{-CH}_2$ , overlays t,  $J$  7.4,  $3\times\text{O}=\text{C-CH}_2$ ), 2.43-2.49 (2H, m,  $\equiv\text{C-CH}_2$ ), 4.41 (6H, s,  $3\times\text{CH}_2\text{-O-}$ ), 6.03 (1H, br s,  $\text{NH}$ );  $\delta_{\text{C}}$  (100 MHz,  $\text{CDCl}_3$ ) 14.3 ( $3\times\text{CH}_2\text{-CH}_3$ ), 14.9 ( $\equiv\text{C-CH}_2\text{-CH}_2$ ), 22.8 ( $3\times\text{CH}_2\text{-CH}_3$ ), 25.0 ( $3\times\text{CH}_2$ ), 29.3 ( $3\times\text{CH}_2$ ), 29.4 ( $3\times\text{CH}_2$ ), 29.5 ( $3\times\text{CH}_2$ ), 29.6 ( $3\times\text{CH}_2$ ), 29.8 ( $3\times\text{CH}_2$ ) 32.1 ( $3\times\text{CH}_2$ ), 34.3 ( $3\times\text{CH}_2$ ), 36.0 ( $\equiv\text{C-CH}_2\text{-CH}_2$ ), 58.7 ( $\text{CR}_3\text{N}$ ), 62.7 ( $3\times\text{C-CH}_2\text{-O-}$ ), 69.5 ( $\equiv\text{CH}$ ), 82.8 ( $\text{HC}\equiv\text{C-}$ ), 171.2 ( $\text{O}=\text{C}$ ), 173.6 ( $3\times\text{O}=\text{C}$ ); Accurate mass (ESI): Found: 748.6082  $\text{C}_{45}\text{H}_{82}\text{O}_7\text{N}$  ( $\text{MH}^+$ ) requires 748.6086.

**2-(Pent-4-ynamido)-2-((tetradecanoyloxy)methyl)propane-1,3-diyl ditetradecanoate (19)**

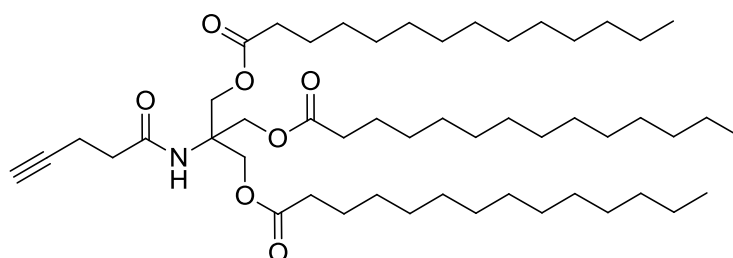

Synthesised in accordance with General Procedure B. Purification by column chromatography (3:1, petrol/ether) afforded the compound (492 mg, 79%) as a white solid;  $\nu_{\max}/\text{cm}^{-1}$  (thin film) 2916s, 2849s, 1736s, 1652s, 1555m, 1469m, 1373m, 1269m;  $\delta_{\text{H}}$  (400 MHz,  $\text{CDCl}_3$ ) 0.86 (9H, t,  $J$  6.4,  $3\times\text{CH}_2\text{-CH}_3$ ), 1.17-1.33 (60H, m,  $30\times\text{CH}_2$ ) 1.54-1.63 (6H, m,  $3\times\text{O=C-CH}_2\text{-CH}_2$ ), 1.96 (1H, t,  $J$  2.7,  $\equiv\text{CH}$ ), 2.26-2.37 (8H, m,  $\equiv\text{C-CH}_2\text{-CH}_2$ , overlays t,  $J$  7.7,  $3\times\text{O=C-CH}_2$ ), 2.43-2.49 (2H, m,  $\equiv\text{C-CH}_2$ ), 4.41 (6H, s,  $3\times\text{CH}_2\text{-O-}$ ), 6.03 (1H, br s, NH);  $\delta_{\text{C}}$  (100 MHz,  $\text{CDCl}_3$ ) 14.3 ( $3\times\text{CH}_2\text{-CH}_3$ ), 14.9 ( $\equiv\text{C-CH}_2\text{-CH}_2$ ), 22.9 ( $3\times\text{CH}_2\text{-CH}_3$ ), 25.0 ( $3\times\text{CH}_2$ ), 29.3 ( $3\times\text{CH}_2$ ), 29.4 ( $3\times\text{CH}_2$ ), 29.5 ( $3\times\text{CH}_2$ ), 29.6 ( $3\times\text{CH}_2$ ), 29.8 ( $6\times\text{CH}_2$ ), 29.8 ( $3\times\text{CH}_2$ ), 29.8 ( $3\times\text{CH}_2$ ), 32.1 ( $3\times\text{CH}_2$ ), 34.3 ( $3\times\text{CH}_2$ ), 36.0 ( $\equiv\text{C-CH}_2\text{-CH}_2$ ), 58.7 ( $\text{CR}_3\text{N}$ ), 62.7 ( $3\times\text{C-CH}_2\text{-O-}$ ), 69.5 ( $\equiv\text{CH}$ ), 82.8 ( $\text{HC}\equiv\text{C-}$ ), 171.2 ( $\text{O=C}$ ), 173.6 ( $3\times\text{O=C}$ ); Accurate mass (ESI): Found: 832.7024  $\text{C}_{51}\text{H}_{94}\text{O}_7\text{N}$  ( $\text{MH}^+$ ) requires 832.7025.

**2-((Palmitoyloxy)methyl)-2-(pent-4-ynamido)propane-1,3-diyl dipalmitate (20)**

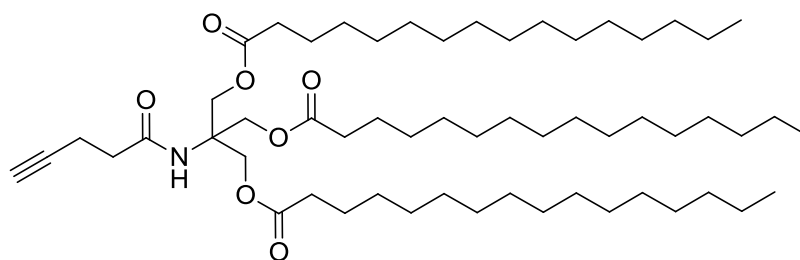

Synthesised in accordance with General Procedure B. Purification by column chromatography (5:1, petrol/ether) afforded the compound (442 mg, 61%) as a white solid;  $\nu_{\max}/\text{cm}^{-1}$  (thin film) 2916s, 2849s, 1736s, 1652s, 1552m, 1469m, 1373m, 1266m;  $\delta_{\text{H}}$  (400 MHz,  $\text{CDCl}_3$ ) 0.86 (9H, t,  $J$  6.2,  $3\times\text{CH}_2\text{-CH}_3$ ), 1.19-1.34 (72H, m,  $36\times\text{CH}_2$ ) 1.54-1.63 (6H, m,  $3\times\text{O=C-CH}_2\text{-CH}_2$ ), 1.96 (1H, t,  $J$  2.7,  $\equiv\text{CH}$ ), 2.27-2.37 (8H, m,  $\equiv\text{C-CH}_2\text{-CH}_2$ , overlays t,  $J$  7.4,  $3\times\text{O=C-CH}_2$ ), 2.43-2.50 (2H, m,  $\equiv\text{C-CH}_2$ ), 4.41 (6H, s,  $3\times\text{CH}_2\text{-O-}$ ), 6.03 (1H, br s, NH);  $\delta_{\text{C}}$  (100 MHz,  $\text{CDCl}_3$ ) 14.3 ( $3\times\text{CH}_2\text{-CH}_3$ ), 14.9 ( $\equiv\text{C-CH}_2\text{-CH}_2$ ), 22.9 ( $3\times\text{CH}_2\text{-CH}_3$ ), 25.0 ( $3\times\text{CH}_2$ ), 29.3 ( $3\times\text{CH}_2$ ), 29.4 ( $3\times\text{CH}_2$ ), 29.5 ( $3\times\text{CH}_2$ ), 29.7 ( $3\times\text{CH}_2$ ), 29.8 ( $6\times\text{CH}_2$ ), 29.8 ( $6\times\text{CH}_2$ ), 29.9 ( $6\times\text{CH}_2$ ), 32.1 ( $3\times\text{CH}_2$ ), 34.3 ( $3\times\text{CH}_2$ ), 36.0 ( $\equiv\text{C-CH}_2\text{-CH}_2$ ), 58.7 ( $\text{CR}_3\text{N}$ ), 62.7 ( $3\times\text{C-CH}_2\text{-O-}$ ), 69.5 ( $\equiv\text{CH}$ ), 82.8 ( $\text{HC}\equiv\text{C-}$ ), 171.2 ( $\text{O=C}$ ), 173.6 ( $3\times\text{O=C}$ ); Accurate mass (ESI): Found: 916.7965  $\text{C}_{40}\text{H}_{73}\text{O}_6$  ( $\text{MH}^+$ ) requires 916.7964.

**2-(Pent-4-ynamido)-2-(((3,7,11,15-tetramethylhexadecanoyl)oxy)methyl)propane-1,3-diyl bis(3,7,11,15-tetramethylhexadecanoate) (21)**

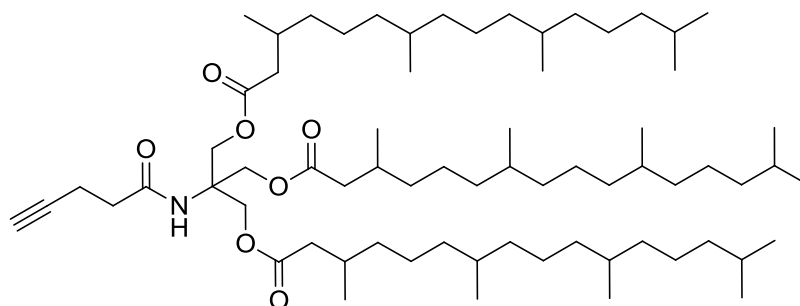

Synthesised in accordance with General Procedure B. Purification by column chromatography (5:1, petrol/ether) afforded the compound (293 mg, 61%) as a colourless, viscous oil;  $\nu_{\max}/\text{cm}^{-1}$  (thin film) 2953s, 2924s, 2868s, 1742s, 1658s, 1546m, 1462m, 1378m, 1244m;  $\delta_{\text{H}}$  (400 MHz,  $\text{CDCl}_3$ ) 0.81-0.87 (36H, app. dd,  $J$  6.8, 6.5,  $12 \times \text{CH}-\text{CH}_3$ ), 0.91 (6H, d,  $J$  6.5,  $3 \times \text{O}=\text{C}-\text{CH}_2-\text{CH}-\text{CH}_3$ ), 0.98-1.41 (60H, m,  $27 \times \text{CH}_2$  and  $6 \times \text{CH}$ ), 1.50 (3H, app. non,  $J$  6.5,  $3 \times \text{CH}_2-\text{CH}-(\text{CH}_3)_2$ ), 1.86-1.98 (3H, m,  $3 \times \text{O}=\text{C}-\text{CH}_2-\text{CH}$  overlays t,  $J$  2.7,  $\equiv \text{CH}$ ), 2.10 (3H, dd,  $J$  14.4, 8.5,  $3 \times \text{O}=\text{C}-\text{CHH}'-\text{CH}$ ), 2.28-2.37 (9H, m,  $3 \times \text{O}=\text{C}-\text{CHH}'-\text{CH}$  and  $3 \times \text{O}=\text{C}-\text{CH}_2$ ), 2.42-2.49 (2H, m,  $\equiv \text{C}-\text{CH}_2$ ), 4.42 (6H, s,  $3 \times \text{CH}_2-\text{O}-$ ), 6.06 (1H, br s, NH);  $\delta_{\text{C}}$  (100 MHz,  $\text{CDCl}_3$ ) 14.9 ( $\equiv \text{C}-\text{CH}_2-\text{CH}_2$ ), 19.7 ( $\text{CH}_3$ ), 19.8 ( $\text{CH}_3$ ), 19.8 ( $2 \times \text{CH}_3$ ), 19.8 ( $3 \times \text{CH}_3$ ), 19.9 ( $\text{CH}_3$ ), 19.9 ( $\text{CH}_3$ ), 22.8 ( $3 \times \text{CH}_3$ ), 22.9 ( $3 \times \text{CH}_3$ ), 24.5 ( $3 \times \text{CH}_2$ ), 24.6 ( $3 \times \text{CH}_2$ ), 25.0 ( $3 \times \text{CH}_2$ ), 28.1 ( $3 \times \text{CH}$ ), 30.5 ( $3 \times \text{CH}$ ), 32.9 ( $3 \times \text{CH}$ ), 33.0 ( $3 \times \text{CH}$ ), 36.0 ( $\equiv \text{C}-\text{CH}_2-\text{CH}_2$ ), 37.2 ( $3 \times \text{CH}_2$ ), 37.3 ( $\text{CH}_2$ ), 37.4 ( $\text{CH}_2$ ), 37.4 ( $2 \times \text{CH}_2$ ), 37.5 ( $\text{CH}_2$ ), 37.6 ( $2 \times \text{CH}_2$ ), 37.6 ( $2 \times \text{CH}_2$ ), 37.6 ( $2 \times \text{CH}_2$ ), 37.7 ( $\text{CH}_2$ ), 39.5 ( $3 \times \text{CH}_2-\text{CH}-(\text{CH}_3)_2$ ), 41.7 ( $\text{O}=\text{C}-\text{CH}_2-\text{CH}$ ), 41.8 ( $\text{O}=\text{C}-\text{CH}_2-\text{CH}$ ), 41.8 ( $\text{O}=\text{C}-\text{CH}_2-\text{CH}$ ), 58.7 ( $\text{CR}_3\text{N}$ ), 62.7 ( $3 \times \text{C}-\text{CH}_2-\text{O}-$ ), 69.5 ( $\equiv \text{CH}$ ), 82.8 ( $\text{HC}\equiv\text{C}-$ ), 171.1 ( $\text{O}=\text{C}$ ), 173.1 ( $3 \times \text{O}=\text{C}$ ); Accurate mass (ESI): Found: 1084.9813  $\text{C}_{69}\text{H}_{130}\text{O}_7\text{N}$  ( $\text{MH}^+$ ) requires 1084.9849.

**(7Z,7'Z)-2-(((Z)-hexadec-7-enyloxy)methyl)-2-(pent-4-ynamido)propane-1,3-diyl bis(hexadec-7-enoate) (22)**

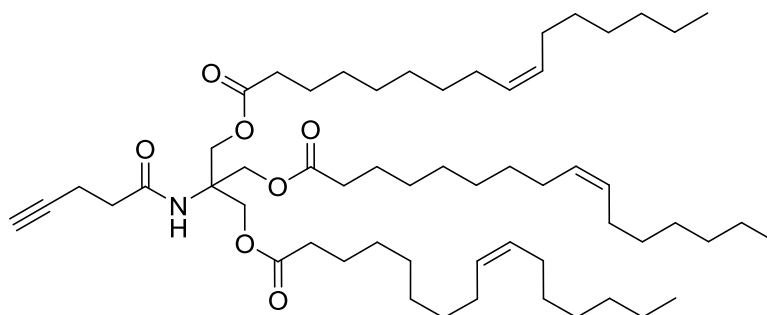

Synthesised in accordance with General Procedure B. Purification by column chromatography (5:1, petrol/ether) afforded the compound (240 mg, 53%) as a colourless, viscous oil;  $\nu_{\max}/\text{cm}^{-1}$  (thin film) 2923s, 2853s, 1743s, 1658s, 1545m, 1465m, 1378m, 1239m;  $\delta_{\text{H}}$  (400 MHz,  $\text{CDCl}_3$ ) 0.86 (9H, t,  $J$  6.2,  $3\times\text{CH}_2\text{-CH}_3$ ), 1.20-1.35 (48H, m,  $24\times\text{CH}_2$ ) 1.54-1.64 (6H, m,  $3\times\text{O=C-CH}_2\text{-CH}_2$ ), 1.94-2.04 (13H, m,  $6\times\text{=CH-CH}_2$  overlays  $\equiv\text{CH}$ ), 2.26-2.38 (8H, m,  $\equiv\text{C-CH}_2\text{-CH}_2$ , overlays t,  $J$  7.6,  $3\times\text{O=C-CH}_2$ ), 2.43-2.49 (2H, m,  $\equiv\text{C-CH}_2$ ), 4.41 (6H, s,  $3\times\text{CH}_2\text{-O-}$ ), 5.32 (6H, dt,  $J$  5.6, 3.4,  $3\times\text{-CH=CH-}$ ), 6.03 (1H, br s, NH);  $\delta_{\text{C}}$  (100 MHz,  $\text{CDCl}_3$ ) 14.3 ( $3\times\text{CH}_2\text{-CH}_3$ ), 14.9 ( $\equiv\text{C-CH}_2\text{-CH}_2$ ), 22.8 ( $3\times\text{CH}_2\text{-CH}_3$ ), 25.0 ( $3\times\text{CH}_2$ ), 27.3 ( $3\times\text{=C-CH}_2$ ), 27.4 ( $3\times\text{CH}_2\text{-C=}$ ), 29.1 ( $3\times\text{CH}_2$ ), 29.3 ( $3\times\text{CH}_2$ ), 29.3 ( $6\times\text{CH}_2$ ), 29.9 ( $3\times\text{CH}_2$ ), 29.9 ( $3\times\text{CH}_2$ ), 31.9 ( $3\times\text{CH}_2$ ), 34.2 ( $3\times\text{CH}_2$ ), 36.0 ( $\equiv\text{C-CH}_2\text{-CH}_2$ ), 58.7 ( $\text{CR}_3\text{N}$ ), 62.7 ( $3\times\text{C-CH}_2\text{-O-}$ ), 69.6 ( $\equiv\text{CH}$ ), 82.8 ( $\text{HC}\equiv\text{C-}$ ), 129.9 ( $3\times\text{C=C}$ ) 130.2 ( $3\times\text{C=C}$ ), 171.2 ( $\text{O=C}$ ), 173.6 ( $3\times\text{O=C}$ ); Accurate mass (ESI): Found: 910.7496  $\text{C}_{57}\text{H}_{100}\text{O}_7\text{N}$  ( $\text{MH}^+$ ) requires 910.7494.

**(Z)-2-((Oleoyloxy)methyl)-2-(pent-4-ynamido)propane-1,3-diyl dioleate (23)**

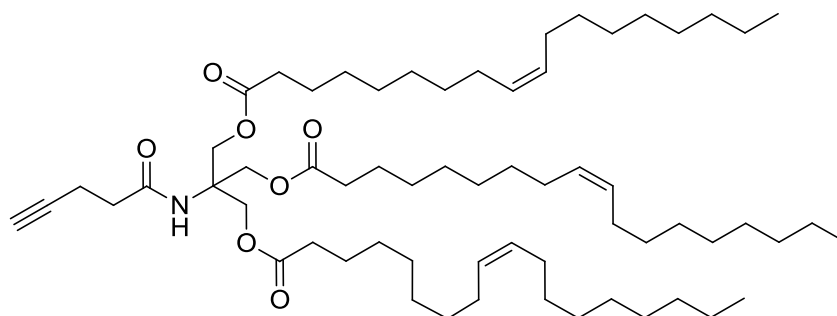



Synthesised in accordance with General Procedure B. Purification by column chromatography (5:1, petrol/ether) afforded the compound (501 mg, 63%) as a colourless, viscous oil;  $\nu_{\max}/\text{cm}^{-1}$  (thin film) 2922s, 2853s, 1742s, 1660s, 1545m, 1465m, 1378m, 1274m;  $\delta_{\text{H}}$  (400 MHz,  $\text{CDCl}_3$ ) 0.86 (9H, t,  $J$  6.8,  $3 \times \text{CH}_2\text{-CH}_3$ ), 1.19-1.35 (60H, m,  $30 \times \text{CH}_2$ ) 1.54-1.64 (6H, m,  $3 \times \text{O}=\text{C-CH}_2\text{-CH}_2$ ), 1.94-2.03 (13H, m,  $6 \times =\text{CH-CH}_2$  overlays  $\equiv\text{CH}$ ), 2.26-2.37 (8H, m,  $\equiv\text{C-CH}_2\text{-CH}_2$ , overlays t,  $J$  7.4,  $3 \times \text{O}=\text{C-CH}_2$ ), 2.43-2.49 (2H, m,  $\equiv\text{C-CH}_2$ ), 4.41 (6H, s,  $3 \times \text{CH}_2\text{-O-}$ ), 5.32 (6H, dt,  $J$  5.7, 3.6,  $3 \times \text{-CH}=\text{CH-}$ ), 6.03 (1H, br s, **NH**);  $\delta_{\text{C}}$  (100 MHz,  $\text{CDCl}_3$ ) 14.3 ( $3 \times \text{CH}_2\text{-CH}_3$ ), 14.9 ( $\equiv\text{C-CH}_2\text{-CH}_2$ ), 22.8 ( $3 \times \text{CH}_2\text{-CH}_3$ ), 25.0 ( $3 \times \text{CH}_2$ ), 27.3 ( $3 \times =\text{C-CH}_2$ ), 27.4 ( $3 \times \text{CH}_2\text{-C=}$ ), 29.3 ( $3 \times \text{CH}_2$ ), 29.3 ( $3 \times \text{CH}_2$ ), 29.5 ( $3 \times \text{CH}_2$ ), 29.7 ( $3 \times \text{CH}_2$ ), 29.9 ( $3 \times \text{CH}_2$ ), 29.9 ( $3 \times \text{CH}_2$ ), 32.1 ( $3 \times \text{CH}_2$ ), 34.2 ( $3 \times \text{CH}_2$ ), 36.0 ( $\equiv\text{C-CH}_2\text{-CH}_2$ ), 58.7 ( $\text{CR}_3\text{N}$ ), 62.7 ( $3 \times \text{C-CH}_2\text{-O-}$ ), 69.6 ( $\equiv\text{CH}$ ), 82.8 ( $\text{HC}\equiv\text{C-}$ ), 129.8 ( $3 \times \text{C}=\text{C}$ ) 130.2 ( $3 \times \text{C}=\text{C}$ ), 171.2 ( $\text{O}=\text{C}$ ), 173.6 ( $3 \times \text{O}=\text{C}$ ); Accurate mass (ESI): Found: 994.8415  $\text{C}_{63}\text{H}_{112}\text{O}_7\text{N}$  ( $\text{MH}^+$ ) requires 994.8441.

**(13Z,13'Z)-2-(((Z)-Docos-13-enoyloxy)methyl)-2-(pent-4-ynamido)propane-1,3-diyl bis(docos-13-enoate) (24)**

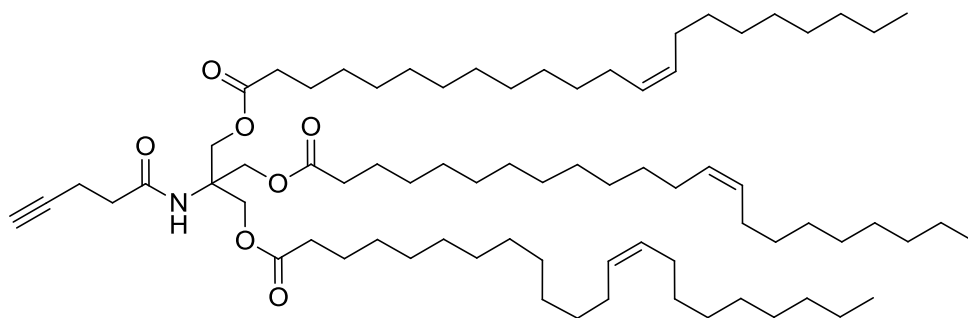

Synthesised in accordance with General Procedure B. Purification by column chromatography (5:1, petrol/ether) afforded the compound (648 mg, 70%) as a white solid;  $\nu_{\max}/\text{cm}^{-1}$  (thin film) 2921s, 2852s, 1743s, 1659s, 1545m, 1465m, 1378m;  $\delta_{\text{H}}$  (400 MHz,  $\text{CDCl}_3$ ) 0.86 (9H, t,  $J$  6.7,  $3 \times \text{CH}_2\text{-CH}_3$ ), 1.19-1.35 (84H, m,  $42 \times \text{CH}_2$ ) 1.54-1.64 (6H, m,  $3 \times \text{O}=\text{C-CH}_2\text{-CH}_2$ ), 1.93-2.04 (13H, m,  $6 \times =\text{CH-CH}_2$  and  $\equiv\text{CH}$ ), 2.27-2.38 (8H, m,  $\equiv\text{C-CH}_2\text{-CH}_2$ , overlays t,  $J$  7.6,  $3 \times \text{O}=\text{C-CH}_2$ ), 2.43-2.49 (2H, m,  $\equiv\text{C-CH}_2$ ), 4.41 (6H, s,  $3 \times \text{CH}_2\text{-O-}$ ), 5.32 (6H, dt,  $J$  9.2, 4.6,  $3 \times \text{-CH}=\text{CH-}$ ), 6.03 (1H, br s, **NH**);  $\delta_{\text{C}}$  (100 MHz,  $\text{CDCl}_3$ ) 14.3 ( $3 \times \text{CH}_2\text{-CH}_3$ ), 14.9 ( $\equiv\text{C-CH}_2\text{-CH}_2$ ), 22.8 ( $3 \times \text{CH}_2\text{-CH}_3$ ), 25.0 ( $3 \times \text{CH}_2$ ), 27.4

(3×=C-CH<sub>2</sub>), 29.3 (3×CH<sub>2</sub>), 29.4 (3×CH<sub>2</sub>), 29.5 (6×CH<sub>2</sub>), 29.5 (3×CH<sub>2</sub>), 29.7 (3×CH<sub>2</sub>), 29.7 (3×CH<sub>2</sub>), 29.8 (3×CH<sub>2</sub>), 29.9 (3×CH<sub>2</sub>), 30.0 (3×CH<sub>2</sub>), 32.1 (3×CH<sub>2</sub>), 34.3 (3×CH<sub>2</sub>), 36.0 (≡C-CH<sub>2</sub>-CH<sub>2</sub>), 58.7 (CR<sub>3</sub>N), 62.7 (3×C-CH<sub>2</sub>-O-), 69.5 (≡CH), 82.8 (HC≡C-), 130.0 (3×C=C) 130.1 (3×C=C), 171.20 (O=C), 173.6 (3×O=C); Accurate mass (ESI): Found: 1163.0320 C<sub>75</sub>H<sub>136</sub>O<sub>7</sub>N (MH<sup>+</sup>) requires 1163.0313.

## Synthesis of sugar head groups

### (2*S*,3*R*,4*S*,5*R*)-tetrahydro-2*H*-pyran-2,3,4,5-tetrayl tetraacetate (**31**)<sup>[2]</sup>

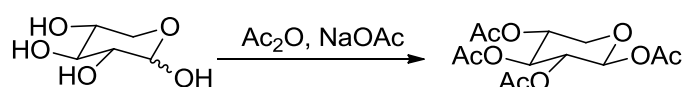

To a stirred suspension of anhydrous sodium acetate (4.36 g, 53.2 mmol) in acetic anhydride (25 mL) heated at reflux was added D(+)-xylose (2.0 g, 13.3 mmol). The reaction mixture was heated for 3 h before cooling to 100 °C and immediately transferred to an ice–water mixture and stirred vigorously until a gum formed. After decanting the aqueous portion, the gum was dissolved in DCM and washed successively with sat. aq. NaHCO<sub>3</sub> solution and brine. The organic layer was dried over MgSO<sub>4</sub> anhydrous and concentrated in vacuo. The title compound (4.05g, 97%) was obtained as a white solid and was used in subsequent reactions without further purification.

### (2*R*,3*R*,4*S*,5*R*)-2-azidotetrahydro-2*H*-pyran-3,4,5-triyl triacetate (**32**)<sup>[3]</sup>

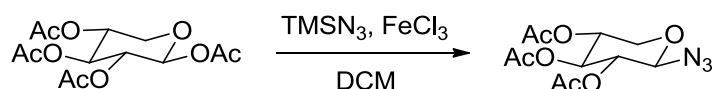

To a stirred solution of FeCl<sub>3</sub> (64 mg, 0.40 mmol) in dry DCM (10 mL) was added xylose tetraacetate **31** (4.18 g, 13.3 mmol) in DCM (20 mL). After stirring for 5 min, a solution of trimethylsilyl azide in DCM (10 mL) was added dropwise. The progress of reaction was monitored by thin layer chromatography (1:2 ethyl acetate/petrol). Once complete consumption of the starting material was observed, the reaction was quenched with sat. aq. NaHCO<sub>3</sub> solution. After separation, the aqueous layer was extracted with DCM and the combined organic extracts washed with brine, dried over

MgSO<sub>4</sub> and concentrated in vacuo to give the crude product. Purification by column chromatography (1:2 ethyl acetate/petrol benzene) afforded the title compound (2.29 g, 58%) as a colourless viscous oil. Data matched literature values.<sup>[3]</sup>

#### 1-Azido-1-β-D-xylopranoside (27)<sup>[4]</sup>

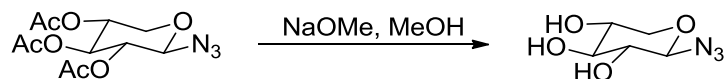

To a stirred solution of azide **32** (2.26g, 7.60 mmol) in methanol (20 mL) was added a catalytic amount of sodium methoxide (10 mg, 0.18 mmol). After stirring for 1 h the reaction mixture was neutralised with Amberlite IR-120[H<sup>+</sup>] resin. The reaction mixture was filtered and concentrated in vacuo to afford the title compound (1.25g, 96%) as a white solid without the need for further purification; δ<sub>H</sub> (400 MHz, MeOD) 3.09 (1H, app. t, *J* 8.4, **CHOH-CHN<sub>3</sub>**), 3.22-3.31 (2H, m, **COH-CHOH-COH & COH-CHOH-CH<sub>2</sub>**), 3.42-3.50 (1H, m, **O-CHH'**), 3.90 (1H, dd, *J* 10.6, 5.0, **O-CHH'**), 4.39 (1H, d, *J* 8.4, **CHN<sub>3</sub>**); δ<sub>C</sub> (100 MHz, CDCl<sub>3</sub>) 67.8 (**CH<sub>2</sub>**), 69.6 (**C-OH**), 73.5 (**C-OH**), 76.8 (**C-OH**), 91.4 (**C-N<sub>3</sub>**).

## Amphiphile synthesis and characterisation

### General procedure

To each of 24 glass vials (18 mm × 45 mm) in a 4 × 6 array aluminium reaction block, was added a solution of azido sugar (1.0 equiv, ca. 15 mg) in 2:1 *t*-BuOH/water (1.5 mL). Alkyne (1.0 equiv) was added and the reaction block heated, with stirring, to 40 °C. After dissolution, copper powder (ca. 150 mg) was added and the reaction stirred for 24–48 h. The reaction mixture was cooled, diluted with ethanol (2 mL) and filtered through Celite<sup>®</sup> into 24 glass vials (25 mm × 75 mm). Concentration in vacuo on a Genevac EZ-2, followed by vacuum oven drying (50 °C, 3 h), afforded the amphiphile products.

### MALDI-TOF results

**Table S1:** Double-chain amphiphiles.

| Sugar     | Double chain tail | Amphiphile | Predicted mass [MNa] <sup>+</sup> | Experimental mass [MNa] <sup>+</sup> |
|-----------|-------------------|------------|-----------------------------------|--------------------------------------|
| Glucose   | C7                | <b>33</b>  | 652.3                             | 652.4                                |
| Glucose   | C9                | <b>34</b>  | 708.4                             | 708.5                                |
| Glucose   | C11               | <b>35</b>  | 764.5                             | 764.6                                |
| Glucose   | C13               | <b>36</b>  | 820.5                             | 820.6                                |
| Glucose   | Phyt              | <b>37</b>  | 988.8                             | 988.8                                |
| Glucose   | Palm              | <b>38</b>  | 872.6                             | 872.7                                |
| Glucose   | Ole               | <b>39</b>  | 928.6                             | 928.7                                |
| Glucose   | Eruc              | <b>40</b>  | 1040.7                            | 1040.8                               |
| Glucose   | Lin               | <b>41</b>  | 924.7                             | 924.7                                |
| Galactose | C7                | <b>42</b>  | 652.3                             | 652.1                                |
| Galactose | C9                | <b>43</b>  | 708.4                             | 708.3                                |
| Galactose | C11               | <b>44</b>  | 764.5                             | 764.4                                |
| Galactose | C13               | <b>45</b>  | 820.5                             | 820.6                                |
| Galactose | C15               | <b>46</b>  | 876.6                             | 876.5                                |
| Galactose | C17               | <b>47</b>  | 932.7                             | 932.6                                |
| Galactose | Phyt              | <b>48</b>  | 988.7                             | 988.7                                |
| Galactose | Palm              | <b>49</b>  | 872.6                             | 872.5                                |
| Galactose | Ole               | <b>50</b>  | 928.6                             | 928.6                                |
| Galactose | Eruc              | <b>51</b>  | 1040.7                            | 1040.7                               |
| Galactose | Lin               | <b>52</b>  | 924.6                             | 924.6                                |
| Xylose    | C7                | <b>53</b>  | 622.3                             | 622.3                                |
| Xylose    | C9                | <b>54</b>  | 678.4                             | 678.5                                |
| Xylose    | C11               | <b>55</b>  | 734.5                             | 734.6                                |
| Xylose    | C13               | <b>56</b>  | 790.5                             | 790.7                                |
| Xylose    | C15               | <b>57</b>  | 846.6                             | 846.7                                |
| Xylose    | C17               | <b>58</b>  | 902.6                             | 902.8                                |
| Xylose    | Phyt              | <b>59</b>  | 958.8                             | 958.8                                |
| Xylose    | Palm              | <b>60</b>  | 842.5                             | 842.7                                |
| Xylose    | Ole               | <b>61</b>  | 898.6                             | 898.7                                |

|         |      |           |        |           |
|---------|------|-----------|--------|-----------|
| Xylose  | Eruc | <b>62</b> | 1010.7 | 1010.9    |
| Xylose  | Lin  | <b>63</b> | 894.7  | 894.7     |
| Mannose | C7   | <b>64</b> | 652.3  | 652.2     |
| Mannose | C9   | <b>65</b> | 708.4  | 708.3     |
| Mannose | C11  | <b>66</b> | 764.5  | 764.4     |
| Mannose | Phyt | <b>67</b> | 988.7  | 988.7     |
| Mannose | Palm | <b>68</b> | 872.6  | 872.5     |
| Mannose | Ole  | <b>69</b> | 928.6  | 928.6     |
| Lactose | C7   | <b>70</b> | 814.1  | 814.3     |
| Lactose | C9   | <b>71</b> | 870.5  | 870.4     |
| Lactose | C11  | <b>72</b> | 926.6  | 926.5     |
| Lactose | C13  | <b>73</b> | 982.6  | 982.5     |
| Lactose | Phyt | <b>74</b> | 1150.8 | 1150.8    |
| Lactose | Palm | <b>75</b> | 1034.6 | 1034.6    |
| Lactose | Ole  | <b>76</b> | 1090.7 | 1090.7    |
| Lactose | Eruc | <b>77</b> | 1202.8 | 1203.5    |
| Lactose | Lin  | <b>78</b> | 1086.1 | Not found |

**Table S2:** Triple chain amphiphiles.

| Sugar     | Double chain tail | Amphiphile | Predicted mass [MNa] <sup>+</sup> | Experimental mass [MNa] <sup>+</sup> |
|-----------|-------------------|------------|-----------------------------------|--------------------------------------|
| Glucose   | C7                | <b>79</b>  | 807.5                             | 807.6                                |
| Glucose   | C9                | <b>80</b>  | 891.6                             | 891.7                                |
| Glucose   | C11               | <b>81</b>  | 975.7                             | 975.7                                |
| Glucose   | Phyt              | <b>82</b>  | 1312.0                            | 1312.0                               |
| Glucose   | Palm              | <b>83</b>  | 1137.8                            | 1137.8                               |
| Glucose   | Ole               | <b>84</b>  | 1221.9                            | 1221.9                               |
| Glucose   | Eruc              | <b>85</b>  | 1390.0                            | 1390.0                               |
| Galactose | C7                | <b>86</b>  | 807.5                             | 807.4                                |
| Galactose | C9                | <b>87</b>  | 891.6                             | 891.5                                |
| Galactose | C11               | <b>88</b>  | 975.7                             | 975.7                                |
| Galactose | Phyt              | <b>89</b>  | 1312.0                            | 1312.1                               |
| Galactose | Palm              | <b>90</b>  | 1137.8                            | 1137.8                               |
| Galactose | Ole               | <b>91</b>  | 1221.9                            | 1221.9                               |
| Galactose | Eruc              | <b>92</b>  | 1390.1                            | 1390.1                               |
| Xylose    | C7                | <b>93</b>  | 777.5                             | 777.6                                |
| Xylose    | C9                | <b>94</b>  | 861.6                             | 861.7                                |
| Xylose    | C11               | <b>95</b>  | 923.3                             | 945.6                                |
| Xylose    | Phyt              | <b>96</b>  | 1282.0                            | 1282.1                               |
| Xylose    | Palm              | <b>97</b>  | 1107.8                            | 1107.9                               |
| Xylose    | Ole               | <b>98</b>  | 1191.9                            | 1192.0                               |
| Xylose    | Eruc              | <b>99</b>  | 1360.0                            | 1360.0                               |
| Mannose   | C7                | <b>100</b> | 807.5                             | 807.4                                |
| Mannose   | C9                | <b>101</b> | 891.6                             | 891.5                                |
| Mannose   | C11               | <b>102</b> | 975.7                             | 975.7                                |
| Mannose   | Phyt              | <b>103</b> | 1312.0                            | 1312.1                               |
| Mannose   | Palm              | <b>104</b> | 1137.8                            | 1137.9                               |
| Mannose   | Ole               | <b>105</b> | 1221.9                            | 1221.9                               |
| Lactose   | C7                | <b>106</b> | 969.5                             | 969.5                                |
| Lactose   | C9                | <b>107</b> | 1053.6                            | 1053.6                               |
| Lactose   | C11               | <b>108</b> | 1137.7                            | 1137.7                               |
| Lactose   | Phyt              | <b>109</b> | 1474.1                            | 1474.1                               |
| Lactose   | Palm              | <b>110</b> | 1299.9                            | Not found                            |

|         |      |            |        |           |
|---------|------|------------|--------|-----------|
| Lactose | Ole  | <b>111</b> | 1384.0 | 1383.9    |
| Lactose | Eruc | <b>112</b> | 1552.1 | Not found |

### <sup>13</sup>C NMR results

A selection of 15 amphiphiles (3 for each sugar) were randomly selected for <sup>13</sup>C NMR spectroscopy and cover a range of different double and triple chain tails.

#### Glucose – 2 × Ole (**39**)

$\delta_C$  (100 MHz, CD<sub>3</sub>OD) 13.1 (×2), 16.7, 22.3 (×2), 24.6 (×2), 26.7 (×4), 28.7 (×2), 28.8 (×2), 28.9 (×2), 29.0 (×2), 29.1 (×2), 29.2 (×2), 29.4 (×2), 29.5 (×2), 31.7 (×2), 33.4 (×2), 46.2, 57.4, 61.0, 64.8 (×2), 69.5, 72.6, 77.1, 79.8, 88.2, 123.9, 129.4 (×2), 129.5 (×2), 142.2, 172.5, 173.3 (×2).

#### Galactose – 2 × C13 (**45**)

$\delta_C$  (100 MHz, CD<sub>3</sub>OD) 13.1 (×2), 16.7, 22.3 (×2), 24.6 (×2), 28.8 (×2), 29.0 (×2), 29.1 (×2), 29.2 (×2), 29.4 (×2), 29.4 (×2), 29.4 (×2), 29.4 (×2), 31.7 (×2), 33.4 (×2), 46.2, 57.5, 60.9, 64.8 (×2), 68.9, 70.1, 73.9, 78.6, 88.9, 123.4, 142.4, 172.5, 173.4 (×2).

#### Galactose – 2 × Palm (**49**)

$\delta_C$  (100 MHz, CD<sub>3</sub>OD) 13.1 (×2), 16.7, 22.3 (×2), 24.6 (×2), 26.7 (×2), 26.8 (×2), 28.7 (×2), 28.7 (×2), 28.8 (×2), 28.9 (×2), 29.4 (×2), 29.4 (×2), 31.5 (×2), 33.4 (×2), 46.2, 57.5, 60.9, 64.8 (×2), 68.9, 70.1, 73.6, 78.6, 88.9, 123.4, 129.4 (×2), 129.5 (×2), 142.4, 172.5, 173.4 (×2).

#### Xylose – 2 × C15 (**57**)

$\delta_C$  (100 MHz, CD<sub>3</sub>OD) 13.1 (×2), 16.7, 22.3 (×2), 24.6 (×2), 28.8 (×2), 29.0 (×2), 29.1 (×2), 29.2 (×2), 29.4 (×2), 29.4 (×4), 29.4 (×4), 29.7 (×2), 31.7 (×2), 33.4 (×2), 46.2, 57.4, 64.9 (×2), 68.5, 69.2, 72.5, 77.2, 88.9, 123.8, 142.2, 172.6, 173.3 (×2).

#### Mannose – 2 × C7 (**64**)

$\delta_C$  (100 MHz, CD<sub>3</sub>OD) 13.0 (×2), 16.6, 22.3 (×2), 24.6 (×2), 28.7 (×2), 28.7 (×2), 31.5 (×2), 33.4 (×2), 46.2, 57.4, 61.1, 64.8 (×2), 67.2, 68.7, 71.2, 77.4, 87.0, 124.6, 142.5, 172.5, 173.3 (×2).

**Mannose – 2 × Phyt (67)**

$\delta_C$  (100 MHz, CD<sub>3</sub>OD) 16.8, 18.7, 18.7, 18.8 (×2), 18.8, 18.8, 21.6 (×2), 21.7 (×2), 24.0, 24.1, 24.1 (×2), 24.5, 24.5, 27.8 (×2), 30.1, 30.1, 32.5 (×2), 32.6 (×2), 36.5, 36.6, 36.8, 36.8, 36.9, 36.9, 37.0, 37.1, 37.1, 37.2, 39.2 (×2), 41.0, 41.1, 46.1, 57.4, 61.1, 64.8 (×2), 67.2, 68.7, 71.2, 77.3, 87.0, 124.5, 142.5, 172.5, 172.7 (×2).

**Lactose – 2 × C9 (71)**

$\delta_C$  (100 MHz, CD<sub>3</sub>OD) 13.0 (×2), 16.6, 22.3 (×2), 25.6 (×2), 28.8 (×2), 29.0 (×4), 29.2 (×2), 31.7 (×2), 33.4 (×2), 46.2, 57.4, 60.1, 61.1, 64.8 (×2), 68.9, 71.1, 72.2, 73.4, 75.5, 75.8, 78.2, 78.2, 88.0, 103.7, 123.9, 142.2, 172.5, 173.4 (×2).

**Lactose – 2 × Eruc (77)**

$\delta_C$  (100 MHz, CD<sub>3</sub>OD) 13.1 (×2), 16.7, 22.4 (×2), 24.6 (×2), 26.8 (×4), 28.7 (×2), 28.8 (×4), 28.9 (×2), 29.0 (×2), 29.1 (×4), 29.2 (×4), 29.4 (×4), 29.5 (×2), 31.7 (×2), 33.4 (×2), 46.2, 57.4, 60.1, 61.1, 64.8 (×2), 68.9, 71.1, 72.2, 73.4, 75.5, 75.8, 78.2, 78.2, 88.0, 103.7, 123.9, 129.4 (×2), 129.5 (×2), 142.2, 172.5, 173.3 (×2).

**Glucose – 3 × C9 (80)**

$\delta_C$  (100 MHz, CD<sub>3</sub>OD) 13.1 (×3), 21.0, 22.3 (×3), 24.6 (×3), 28.8 (×3), 29.0 (×3), 29.1 (×3), 29.2 (×3), 31.7 (×3), 33.5 (×3), 35.0, 57.7, 61.0, 61.6 (×3), 69.5, 72.6, 77.1, 79.7, 88.2, 121.3, 146.2, 173.3 (×3), 173.5.

**Glucose – 3 × Palm (83)**

$\delta_C$  (100 MHz, CD<sub>3</sub>OD) 13.0 (×3), 21.1, 22.3 (×3), 24.6 (×3), 28.7 (×3), 28.7 (×3), 28.8 (×3), 28.8 (×3), 29.4 (×3), 29.4 (×3), 31.5 (×3), 33.4 (×3), 35.4, 60.6, 61.0 (×3), 62.3, 69.5, 72.6, 77.1, 79.7, 88.2, 121.4, 129.4 (×3), 129.5 (×3), 146.2, 174.2, 174.6 (×3).

Galactose – 3 × Phyt (**89**)

$\delta_C$  (100 MHz, CD<sub>3</sub>OD) 18.7, 18.8, 18.9, 21.0, 21.7 (×3), 21.8 (×3), 24.1, 24.1, 24.1 (×3), 24.2, 24.5 (×3), 27.8 (×3), 30.1 (×3), 32.5, 32.5 (×3), 32.6 (×2), 35.1, 36.6 (×3), 36.7 (×3), 36.8, 36.9, 36.9, 37.0, 37.0 (×3), 37.1 (×3), 37.1 (×3), 37.2, 37.2, 39.2 (×3), 41.1 (×2), 41.1, 57.6, 61.0, 61.6 (×3), 68.9, 70.0, 73.9, 78.5, 88.8, 120.8, 146.3, 172.6 (×3), 173.5.

Xylose – 3 × C11 (**95**)

$\delta_C$  (100 MHz, CD<sub>3</sub>OD) 13.2 (×3), 21.3, 22.5 (×3), 24.8 (×3), 29.0 (×3), 29.1 (×3), 29.2 (×3), 29.3 (×3), 29.5 (×6), 31.8 (×3), 33.6 (×3), 35.5, 61.2 (×3), 62.4, 68.6, 69.4, 72.6, 77.3, 88.9, 121.3, 146.4, 174.4, 174.8 (×3).

Xylose – 3 × Eruc (**99**)

$\delta_C$  (100 MHz, CD<sub>3</sub>OD) 13.0 (×3), 21.1, 22.3 (×3), 24.6 (×3), 26.7 (×3), 26.7 (×3), 28.8 (×3), 28.9 (×3), 28.9 (×3), 29.0 (×3), 29.1 (×3), 29.2 (×3), 29.2 (×3), 29.2 (×3), 29.3 (×3), 29.3 (×3), 29.4 (×3), 29.4 (×3), 31.7 (×3), 33.4 (×3), 35.3, 61.0 (×3), 62.3, 68.4, 69.3, 72.5, 77.2, 88.8, 121.2, 129.4 (×3), 129.5 (×3), 146.3, 174.2, 176.6 (×3).

Mannose – 3 × Ole (**105**)

$\delta_C$  (100 MHz, CD<sub>3</sub>OD) 13.0 (×3), 21.0, 22.3 (×3), 24.6 (×3), 26.7 (×3), 26.7 (×3), 28.7 (×3), 28.8 (×3), 28.8 (×3), 28.9 (×3), 29.0 (×3), 29.2 (×3), 29.4 (×3), 29.4 (×3), 31.7 (×3), 33.4 (×3), 35.3, 61.0 (×3), 61.2, 62.3, 67.2, 68.7, 71.1, 77.1, 86.9, 122.1, 129.4 (×3), 129.5 (×3), 146.5, 174.2, 174.6 (×3).

Lactose – 3 × C7 (**106**)

$\delta_C$  (100 MHz, CD<sub>3</sub>OD) 13.0 (×3), 21.0, 22.2 (×3), 24.6 (×3), 28.7 (×3), 28.1 (×3), 31.4 (×3), 33.4 (×3), 35.2, 60.1, 60.6, 61.0, 61.1 (×3), 61.7, 71.1, 72.2, 73.4, 75.4, 75.8, 78.1, 78.3, 87.9, 103.7, 121.3, 146.3, 173.5 (×3), 174.7.



# <sup>13</sup>C NMR spectra

Glucose - 2 x Oleic  
Amphiphile 39

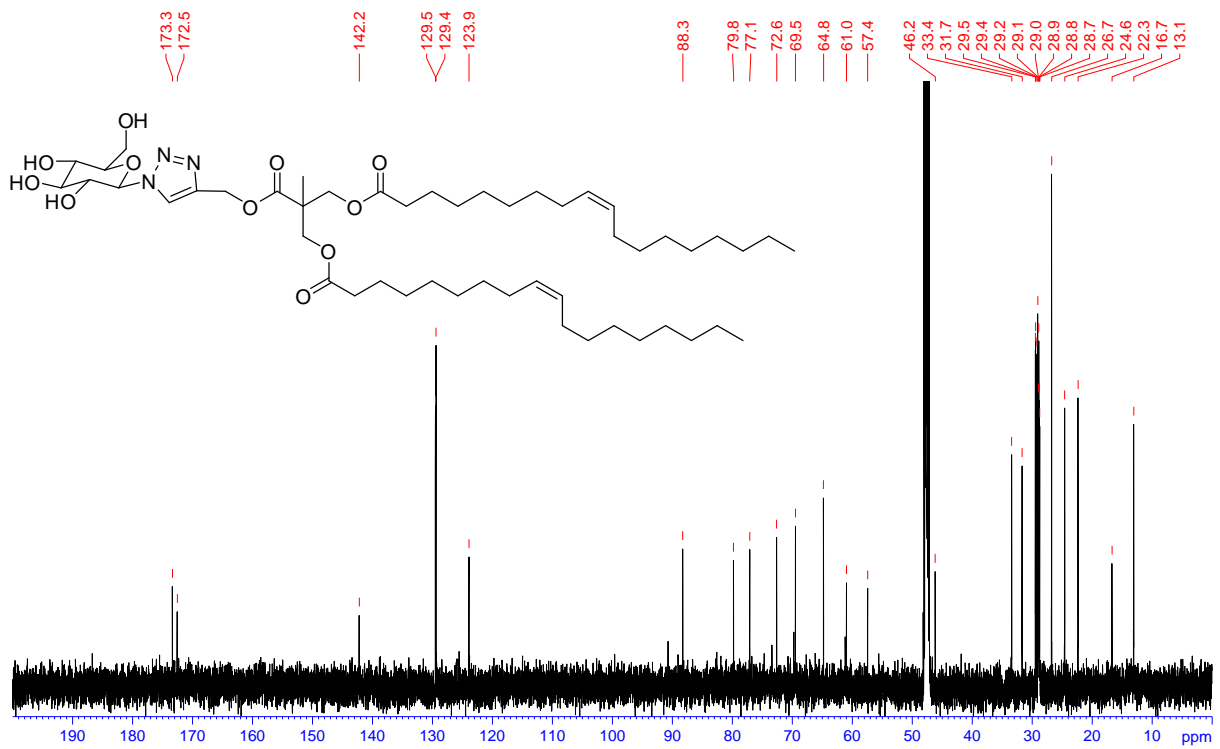

Galactose - 2 x C13  
Amphiphile 45

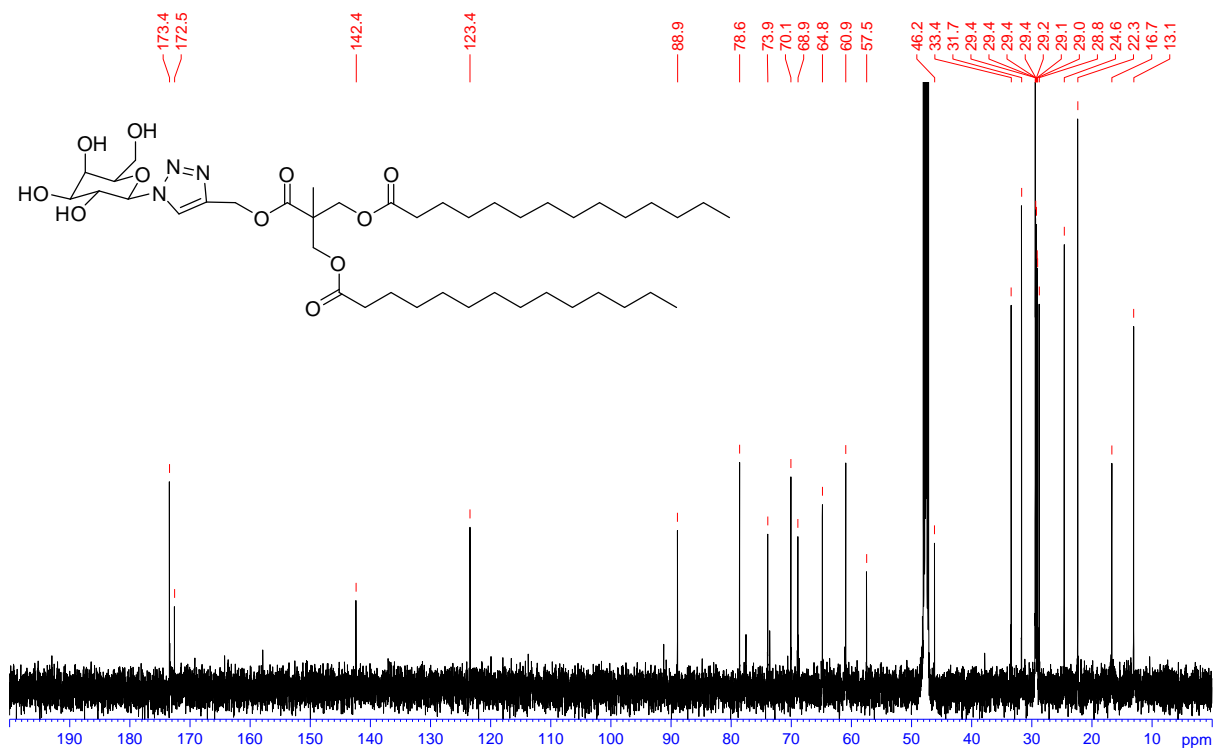

Galactose - 2 x Palmitoleic  
Amphiphile 49

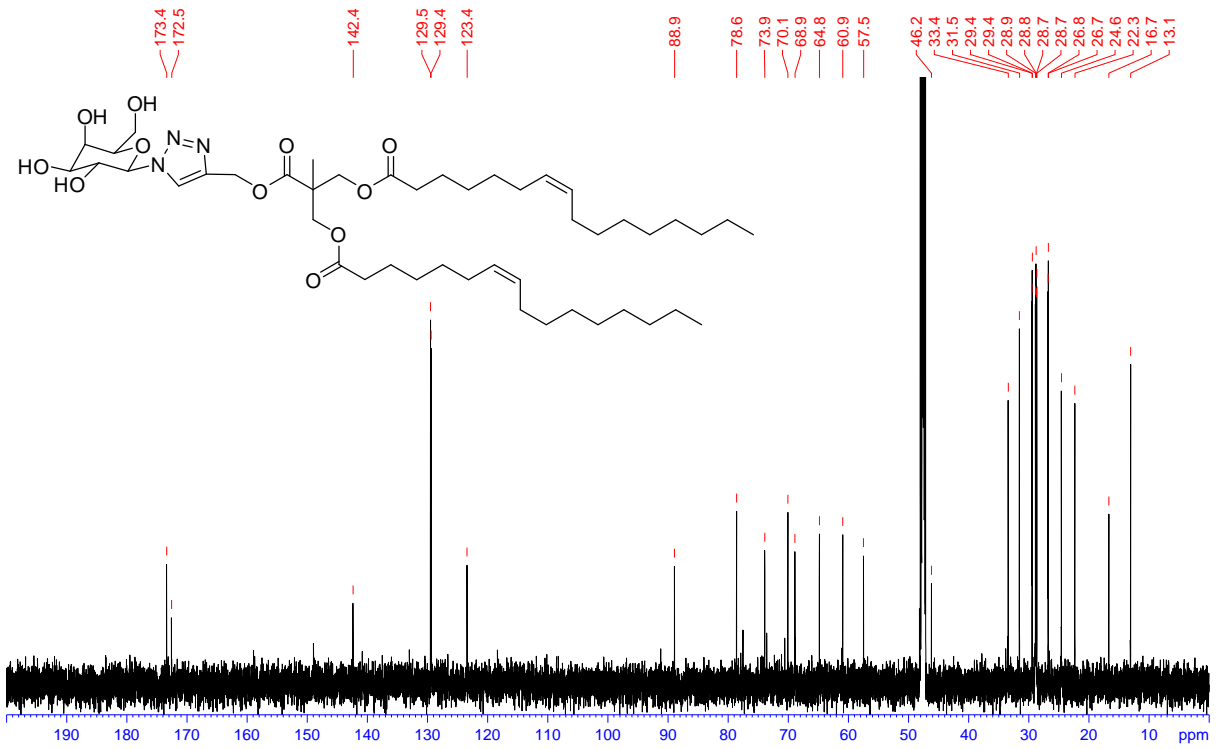

Xylose - 2 x C15  
Amphiphile 57

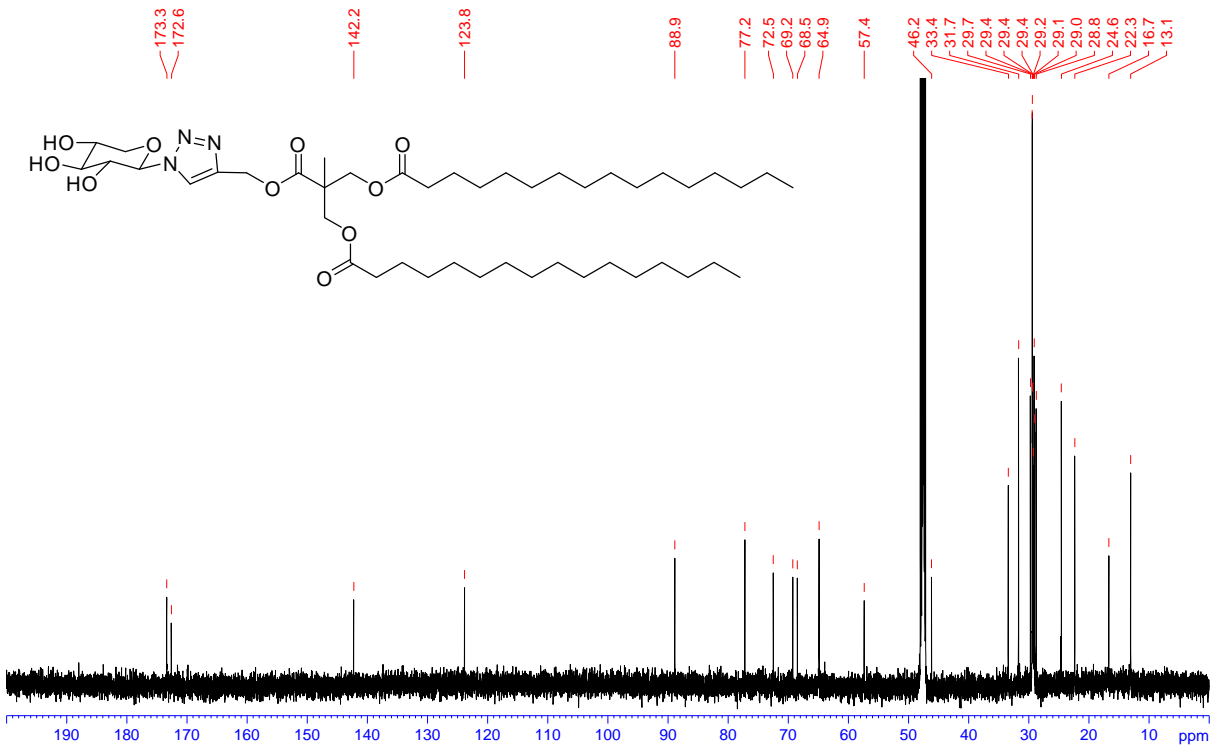

Mannose - 2 x C7  
Amphiphile 64

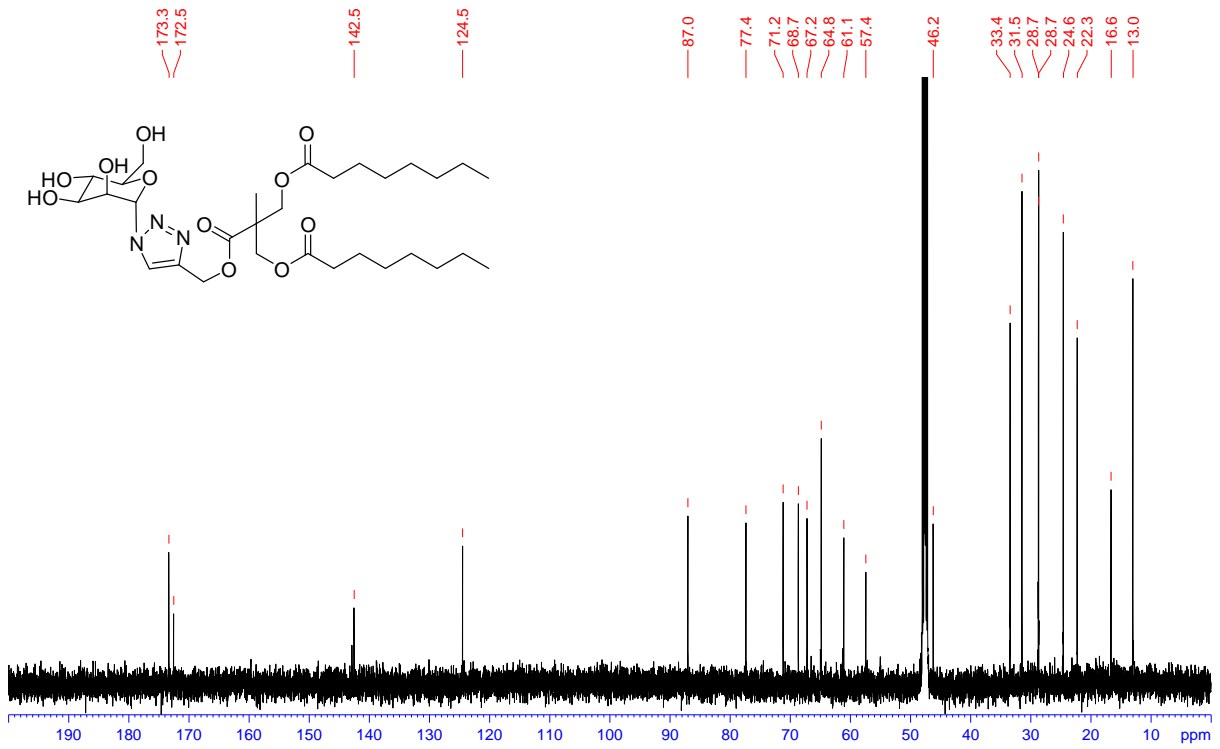

Mannose - 2 x Phytanic  
Amphiphile 67

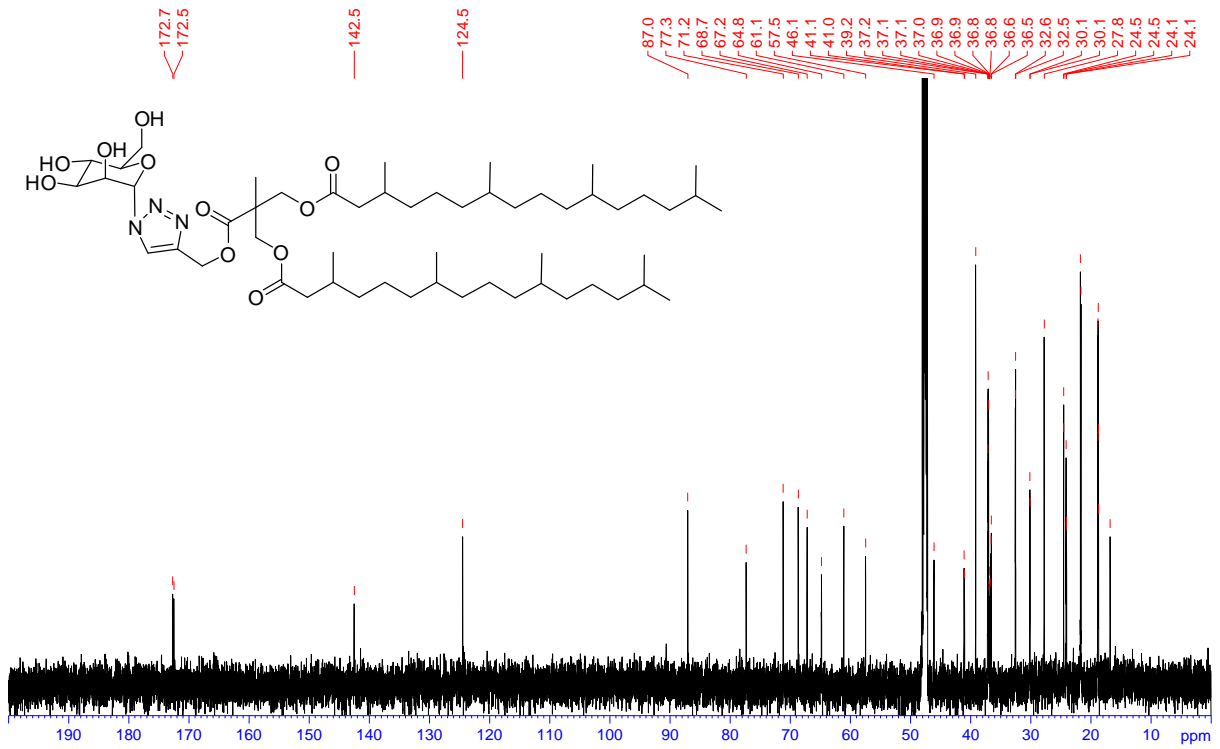

Lactose - 2 x C9  
Amphiphile 71

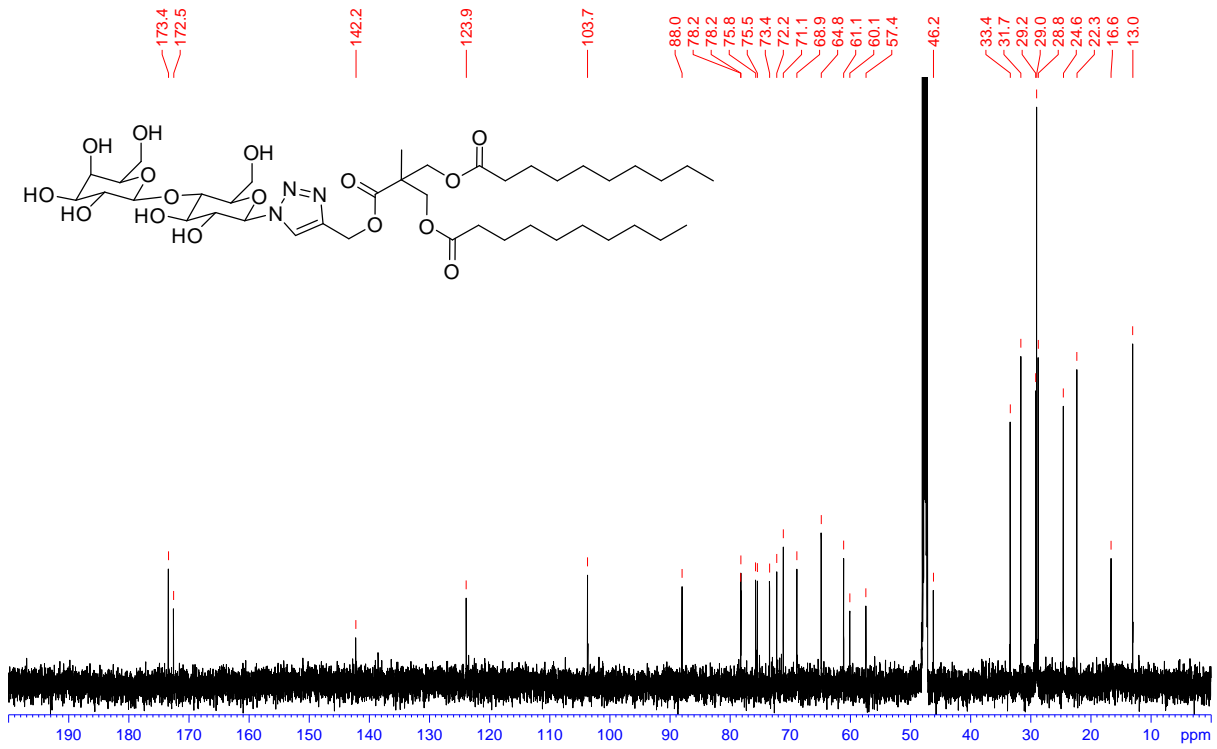

Lactose - 2 x Erucic  
Amphiphile 77

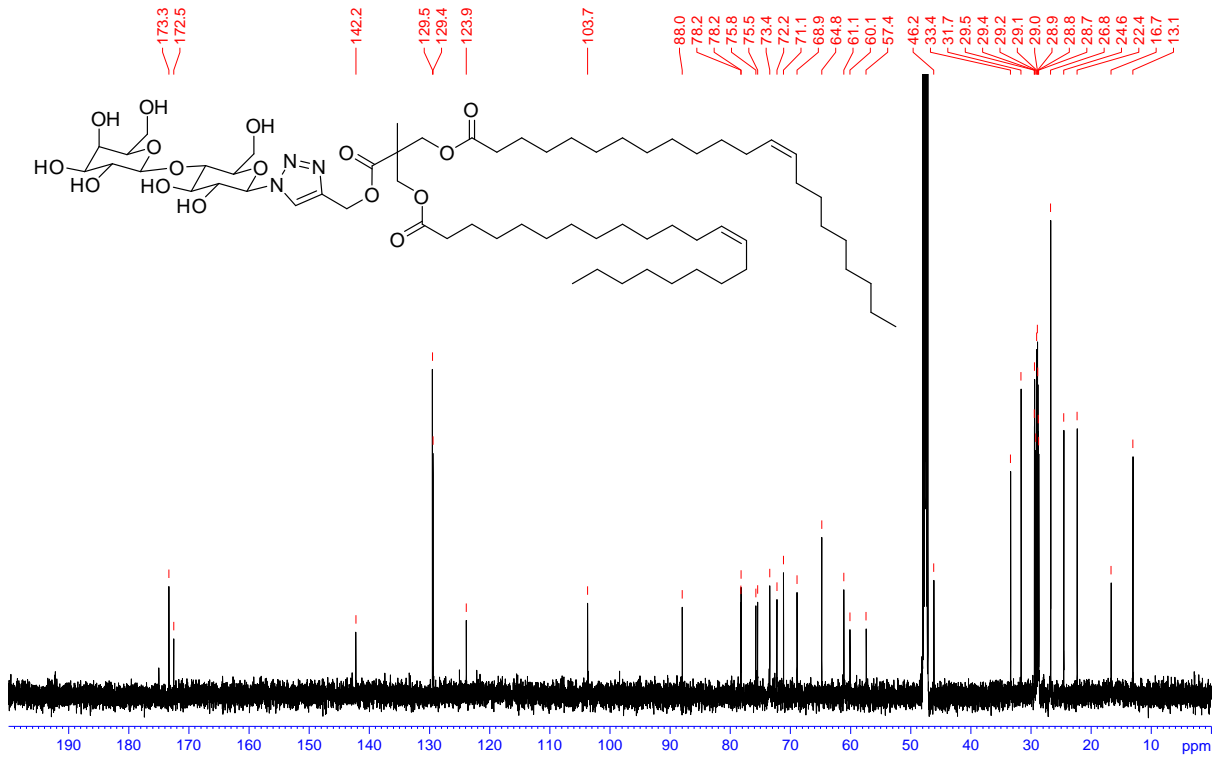

Glucose - 3 x C9  
Amphiphile 80

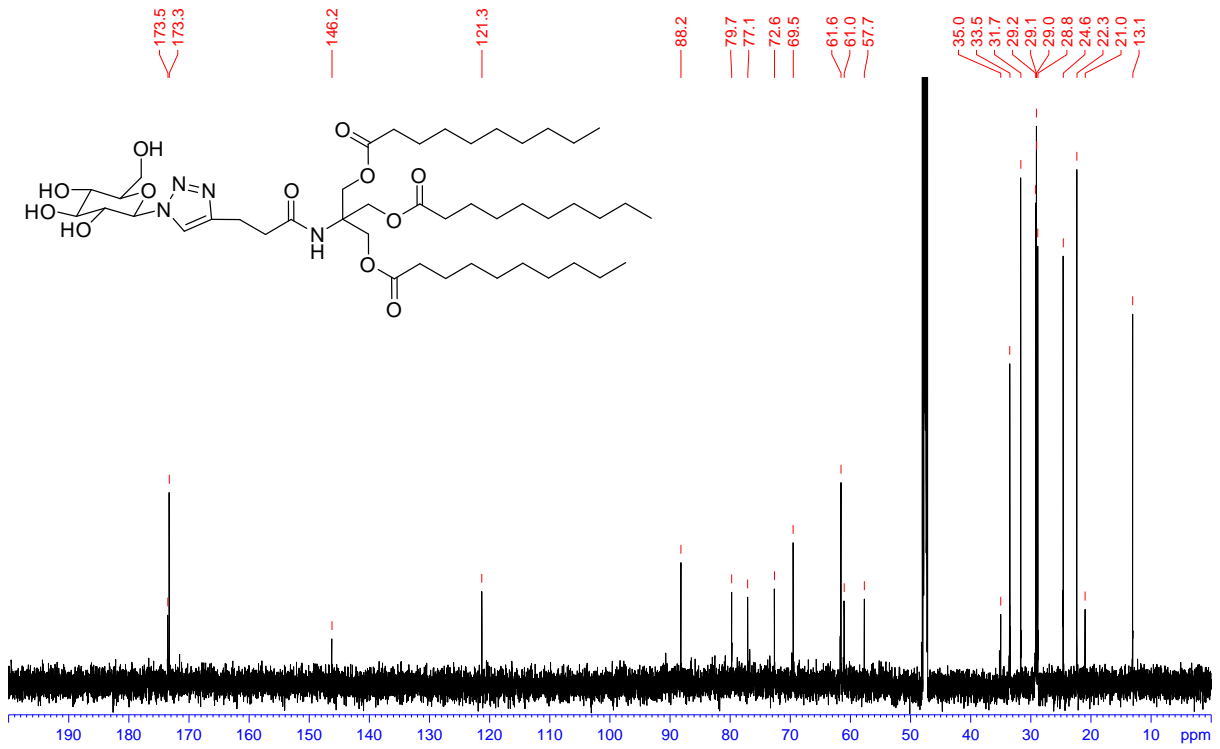

Glucose - 3 x Palmitoleic  
Amphiphile 83

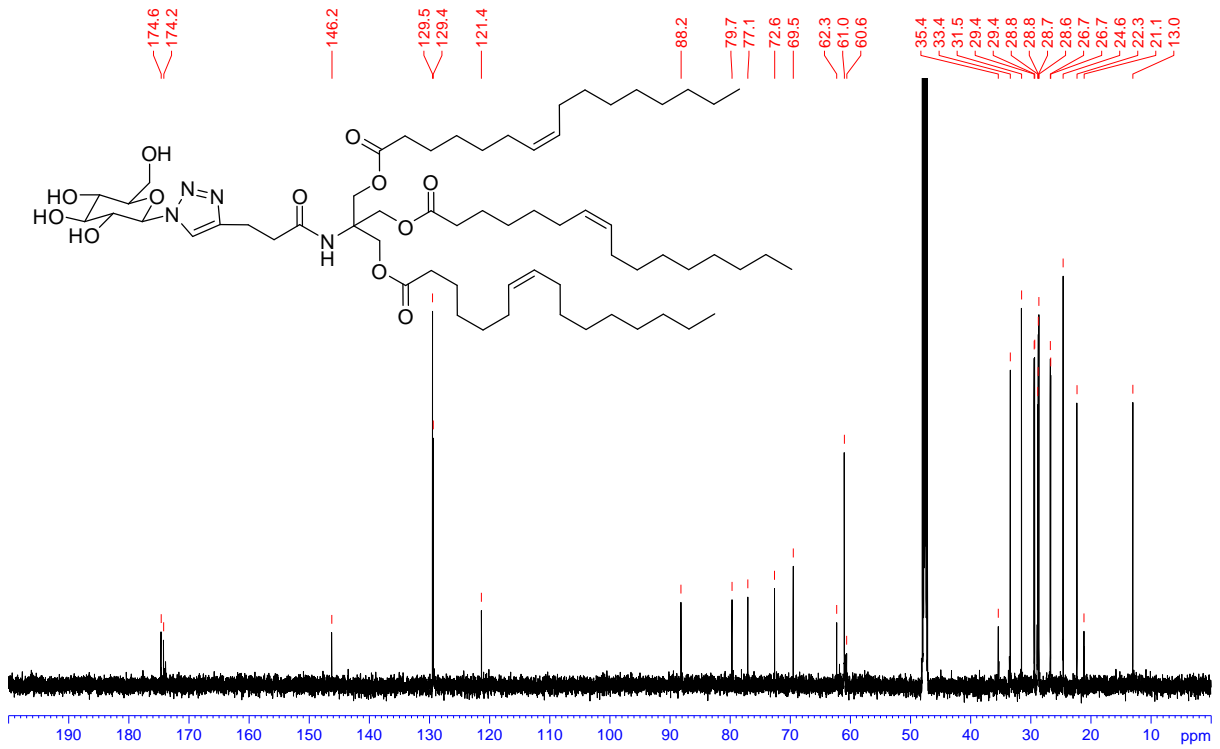

Galactose - 3 x Phytanic  
Amphiphile 89

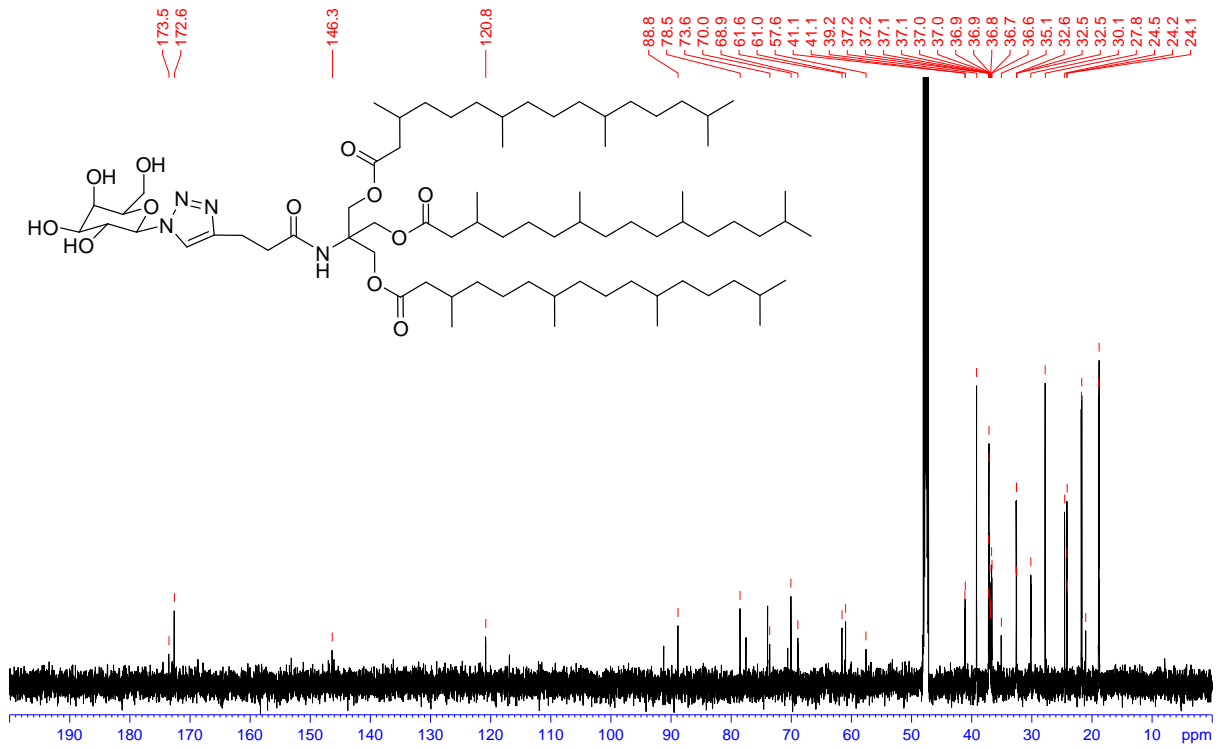

Xylose - 3 x C11  
Amphiphile 95

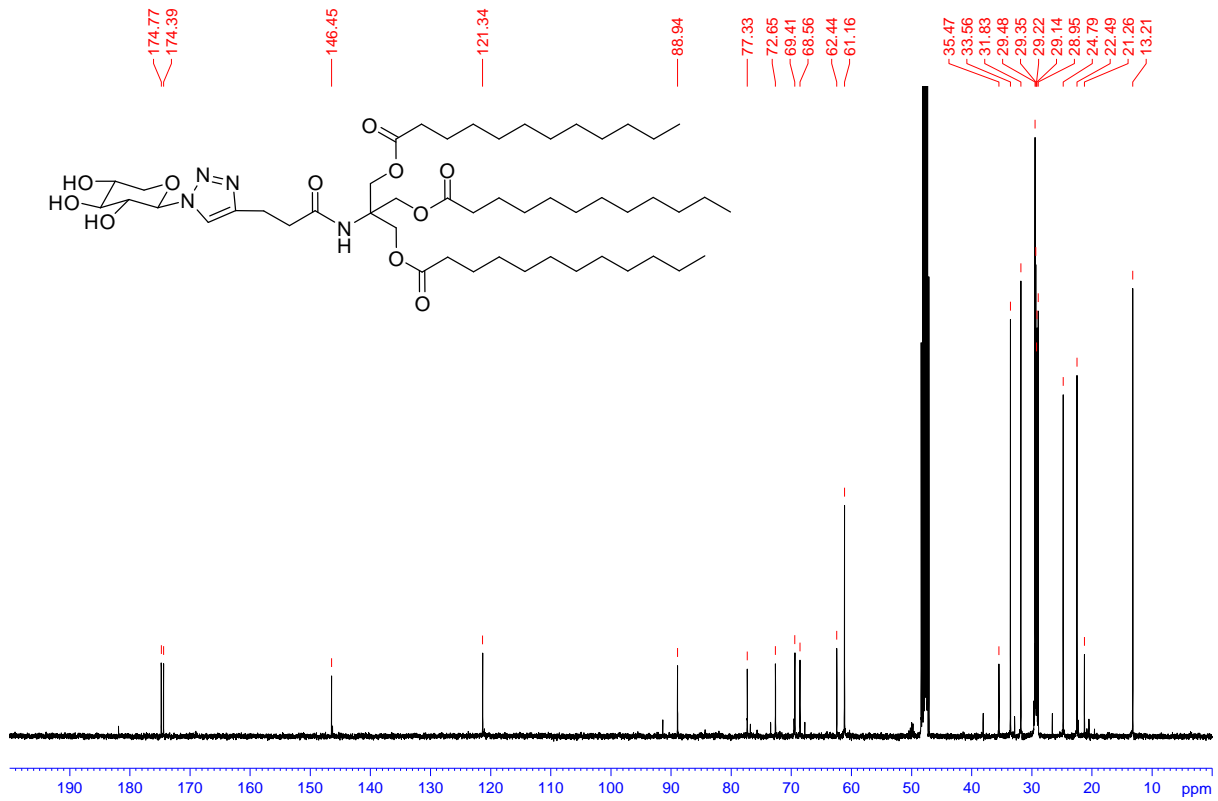

Xylose - 3 x Erucic  
Amphiphile 99

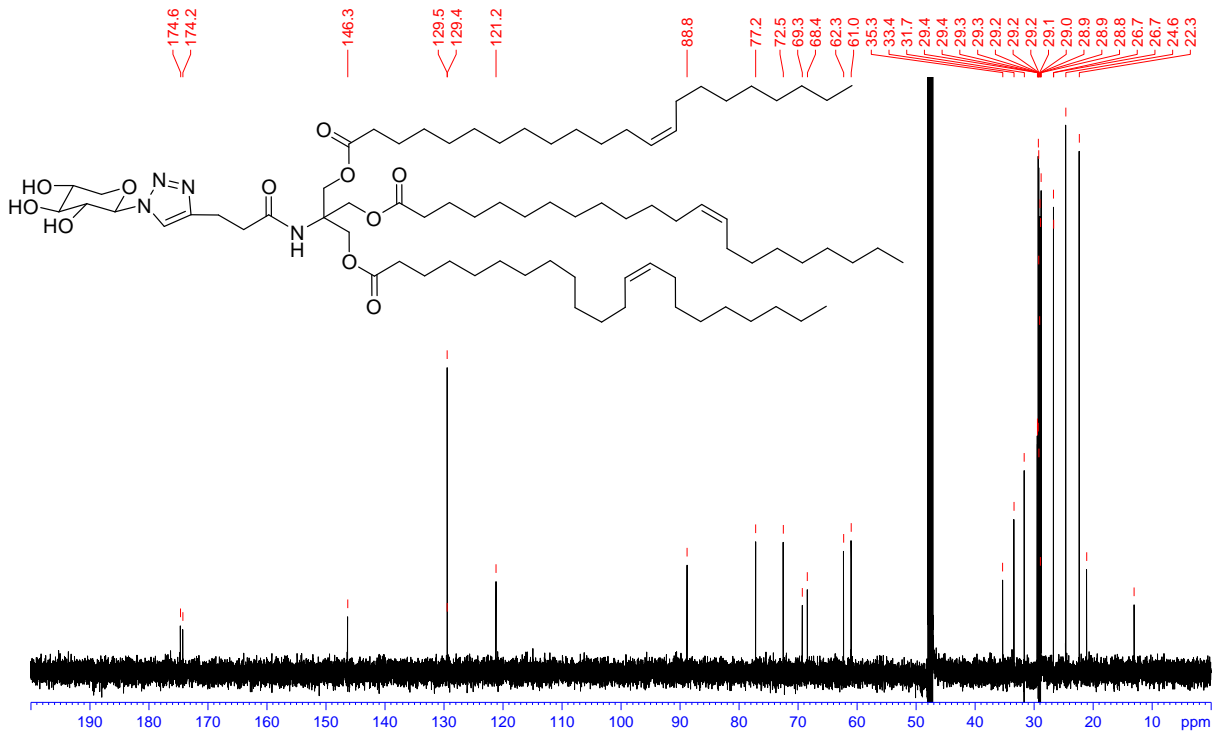

Mannose - 3 x Oleic  
Amphiphile 105

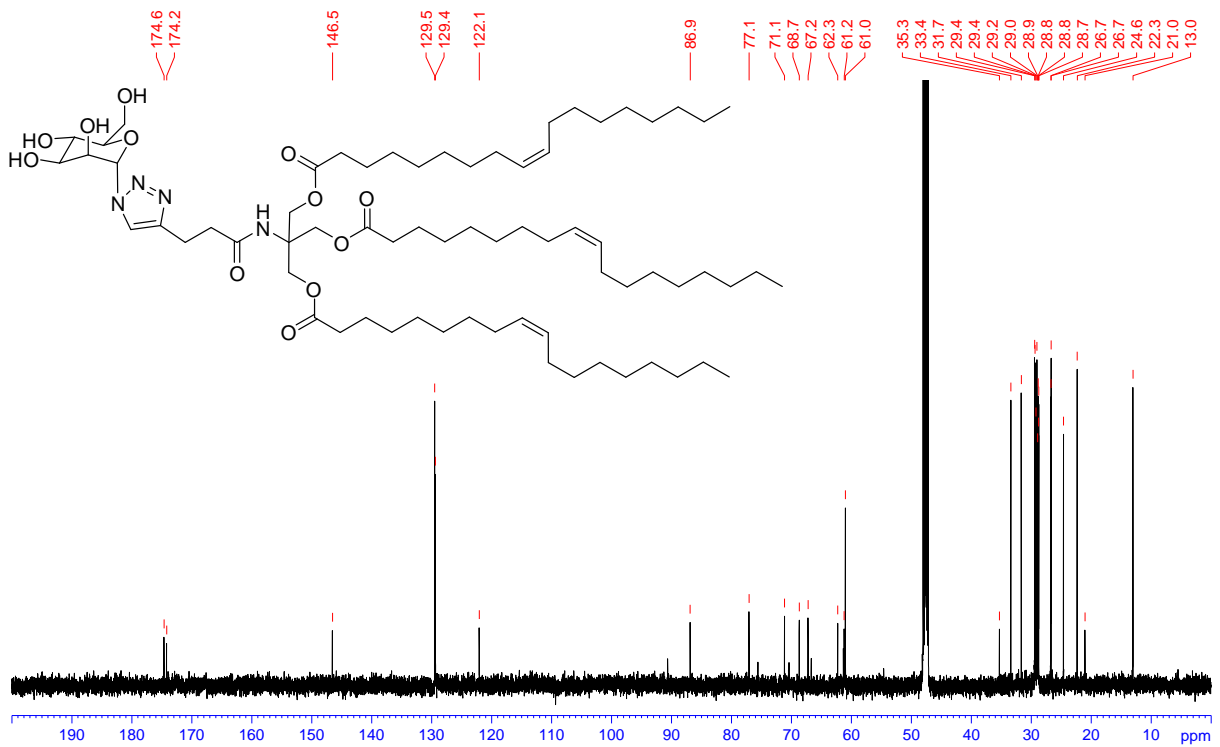

Lactose - 3 x C7  
Amphiphile 106

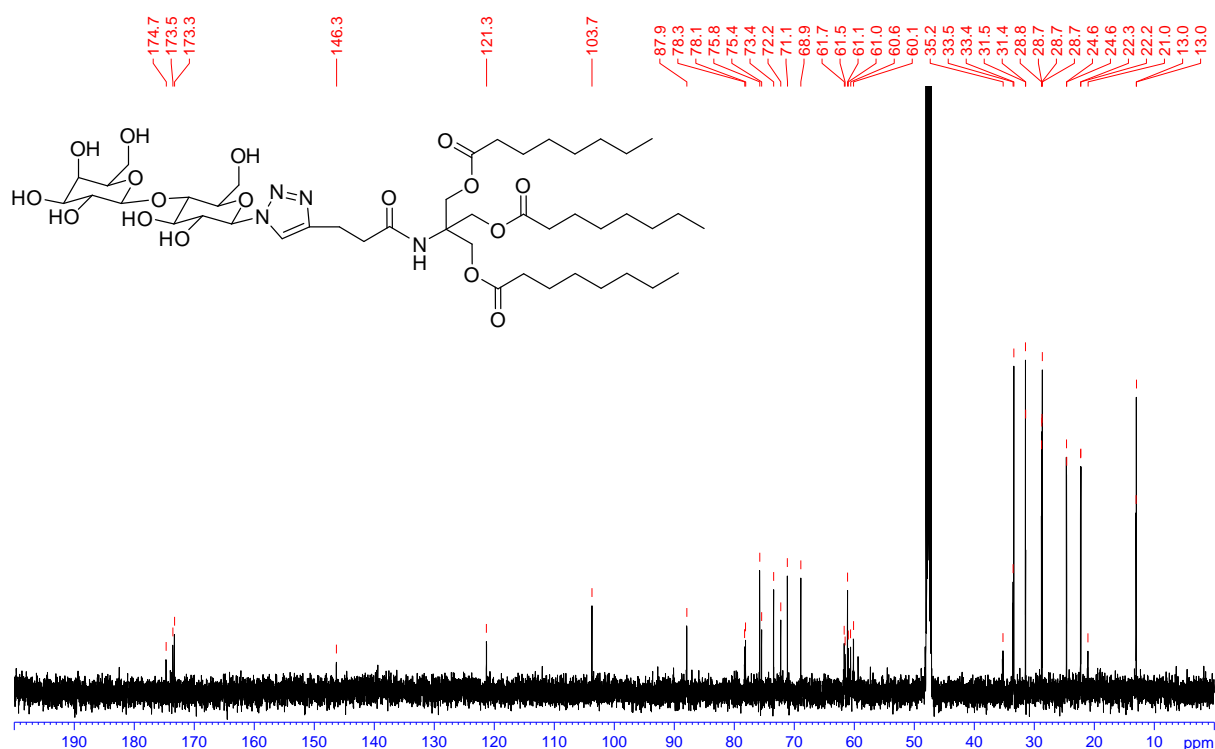

## Preliminary SAXS analysis

The internal liquid crystalline structure was determined using small-angle X-ray scattering. Each amphiphile was dispensed into a 96-well plate and an excess of water (70% w/v) was added to each well using a Mosquito<sup>®</sup> liquid dispensing robot. The samples were equilibrated under controlled conditions of temperature and humidity for 5 days before SAXS analysis was carried out. Samples were analysed within the 96-well plate using a bespoke sample holder at the SAXS beamline at the Australian Synchrotron. The resulting diffraction patterns were analysed using the IDL-based AXcess software package<sup>[5]</sup> and the number and distribution of reflections used to assign the mesophase.

**Table S3:** SAXS data for compounds **33**, **53** and **70** at 70% w/v at 25 °C.

| Amphiphile       |           | Phase    | Lattice parameter (Å) |
|------------------|-----------|----------|-----------------------|
| Glucose – 2 × C7 | <b>33</b> | IA3D     | 164.8                 |
| Xylose – 2 × C7  | <b>53</b> | Micellar | n/a                   |
| Lactose – 2 × C7 | <b>70</b> | Lamellar | 56.2                  |



## References

1. V. Truong, I. Blakey, A. K. Whittaker, *Biomacromolecules* **2012**, *13*, 4012-4021.
2. J. r. m. Camponovo, C. Hadad, J. Ruiz, E. Cloutet, S. Gatard, J. Muzart, S. Bouquillon, D. Astruc, *J. Org. Chem.* **2009**, *74*, 5071-5074.
3. S. B. Salunke, N. S. Babu, C.-T. Chen, *Chem. Commun.* **2011**, *47*, 10440-10442.
4. T. Bravman, V. Belakhov, D. Solomon, G. Shoham, B. Henrissat, T. Baasov, Y. Shoham, *J. Biol. Chem.* **2003**, *278*, 26742-26749.
5. J. M. Seddon, A. M. Squires, C. E. Conn, O. Ces, A. J. Heron, X. Mulet, G. C. Shearman, R. H. Templer, *Philos. Trans. R. Soc., A* **2006**, *364*, 2635-2655.
